# Supplementary material
Source: PubMed Central journal article supplement (PMC9353278)
Supplement: TCT-9999-0-s002.pdf [file TCT-9999-0-s002.pdf]

# Mental Health Status of Medical Students During the COVID-19 Pandemic

## Final Study Results

Number of valid responses: 960

### Demographics

How do you identify in terms of gender?

|            |       |
|------------|-------|
| Male       | 39.3% |
| Female     | 59.9  |
| Non-binary | 0.8   |

What is your ethnicity?

|                                           |       |
|-------------------------------------------|-------|
| Caucasian                                 | 63.0% |
| Asian                                     | 21.9  |
| Two or more                               | 5.4   |
| Hispanic                                  | 3.6   |
| Black                                     | 2.5   |
| American Indian or Alaskan Native         | 0.0   |
| Native Hawaiian or Other Pacific Islander | 0.0   |
| Unknown                                   | 3.5   |

Where do you attend medical school?

|                  |       |
|------------------|-------|
| Allopathic (MD)  | 31.9% |
| Osteopathic (DO) | 68.1% |

Where have you spent the majority of your time since March 2020?

|                       |       |
|-----------------------|-------|
| Rural                 | 18.9% |
| Urban                 | 81.1  |
| Ranges of populations |       |
| Less than 10,000      | 7.9%  |
| 10,000-24,999         | 35.9  |
| 25,000-49,999         | 38.3  |
| 50,000-99,999         | 17.9  |
| 100,000 or more       | 0.0   |

What year are you in medical school?

|        |       |
|--------|-------|
| First  | 35.2% |
| Second | 27.3  |
| Third  | 22.1  |
| Fourth | 15.2  |
| Fifth  | 0.2   |
| Sixth  | 0.0   |

Which are you currently in:

|                |       |
|----------------|-------|
| Didactic years | 63.7% |
| Clinical years | 35.3  |

If you are currently in didactic years, what type of curriculum is your school utilizing?

|             |      |
|-------------|------|
| In person   | 1.0% |
| Virtual     | 25.0 |
| Combination | 74.0 |

If you are in clinical years, what rotation are you currently doing?

|                   |       |
|-------------------|-------|
| Family Medicine   | 14.5% |
| Internal Medicine | 18.2  |
| General Surgery   | 9.5   |
| Psychiatry        | 5.5   |
| Pediatrics        | 13.3  |
| Women's Health    | 8.4   |
| Other             | 30.6  |

# Mental Health Status of Medical Students During the COVID-19 Pandemic

## Final Study Results

### COVID

|                                                                         |             |
|-------------------------------------------------------------------------|-------------|
| Has been diagnosed with COVID-19                                        | 8.3%        |
| Has a loved one (family or friend) who has been diagnosed with COVID-19 | 60.5%       |
| Knows someone who has died of COVID-19                                  | 24.7%       |
| Has had contact with patients with COVID-19                             |             |
| Yes, as part of my education                                            | 24.6%       |
| Yes, on a volunteer basis                                               | 9.5         |
| No                                                                      | 65.9        |
| Level of worry about contracting COVID-19                               |             |
| Mean [Scale 1-10] (SD)                                                  | 5.67 (2.42) |
| Not worried at all (1-3)                                                | 19.9%       |
| Somewhat worried (4-6)                                                  | 45.4        |
| Very worried (7-10)                                                     | 34.7        |

### Depression/anxiety

Over the last 2 weeks, how often has been bothered by

|                                             |       |
|---------------------------------------------|-------|
| Little interest or pleasure in doing things |       |
| Not at all (0 days)                         | 38.2% |
| Several days (1-7 days)                     | 42.8  |
| More than half the days (8-11 days)         | 14.0  |
| Nearly every day (12-14 days)               | 5.0   |
| Feeling down, depressed, or hopeless        |       |
| Not at all (0 days)                         | 39.7% |
| Several days (1-7 days)                     | 40.1  |
| More than half the days (8-11 days)         | 14.7  |
| Nearly every day (12-14 days)               | 5.5   |
| Feeling nervous, anxious, or on edge        |       |
| Not at all (0 days)                         | 20.1% |
| Several days (1-7 days)                     | 38.2  |
| More than half the days (8-11 days)         | 26.1  |
| Nearly every day (12-14 days)               | 15.6  |
| Not being able to stop or control worrying  |       |
| Not at all (0 days)                         | 40.1% |
| Several days (1-7 days)                     | 35.2  |
| More than half the days (8-11 days)         | 16.0  |
| Nearly every day (12-14 days)               | 8.7   |
| Probable Case of Depression [PHQ-2]:        | 25.1% |
| Probable Case of Anxiety [GAD-2]:           | 40.4% |

# Mental Health Status of Medical Students During the COVID-19 Pandemic

## Final Study Results

### **Burnout**

Degree of agreement with each of the statements on scale of 1 (totally disagree) to 7 (totally agree)

|                                                                                          | <u>Percent Agreement</u> |
|------------------------------------------------------------------------------------------|--------------------------|
| I think the dedication I invest in my studies is more than what I should for my health   | 48.0%                    |
| I neglect my personal life when I pursue important achievements in my studies            | 72.4%                    |
| I risk my health when I pursue good results in my studies                                | 57.2%                    |
| I overlook my own needs to fulfill academic demands                                      | 71.6%                    |
| I would like to be pursuing a different career that is more challenging for my abilities | 2.4%                     |
| I feel that my studies are an obstacle to the development of my abilities                | 21.4%                    |
| I would like to be pursuing a different career where I can better develop my talents     | 6.9%                     |
| My studies don't offer me opportunities to develop my abilities                          | 15.8%                    |
| When things in school don't turn out as well as they should, I stop trying               | 8.9%                     |
| I give up in response to difficulties in school                                          | 5.0%                     |
| I give up in the face of any difficulties in my academic tasks                           | 4.3%                     |
| When the effort I invest in school is not enough, I give up                              | 6.5%                     |
| Overload Dimension:                                                                      | 15.9%                    |
| Lack of Development Dimension:                                                           | 6.5%                     |
| Neglect Dimension:                                                                       | 12.0%                    |

### **Suicidal ideation**

|                                                                                                                          |       |
|--------------------------------------------------------------------------------------------------------------------------|-------|
| Since March 2020, seriously considered harming self and/or taking life?                                                  | 7.2%  |
| Started or increased substance use (alcohol, marijuana, or other drugs) to cope with pandemic-related stress or emotions | 19.0% |

### **Access to mental health resources**

|                                                                                     |       |
|-------------------------------------------------------------------------------------|-------|
| Medical school has a counselor or other mental health professional available        | 95.4% |
| Use of mental health resources:                                                     |       |
| I have never accessed a counselor, therapist, or psychiatrist                       | 47.9% |
| I accessed a counselor, therapist, or psychiatrist only prior to March 2020         | 20.4  |
| I accessed a counselor, therapist, or psychiatrist only after March 2020            | 11.7  |
| I accessed a counselor, therapist, or psychiatrist both before and after March 2020 | 20.0  |
| Has person/people in life feel comfortable talking about emotions                   | 92.1% |

# Mental Health Status of Medical Students During the COVID-19 Pandemic Final Study Results

## Demographics

Which are you currently in:

|                |             |
|----------------|-------------|
| Didactic years | 605 (63.7%) |
| Clinical years | 345 (36.3%) |

## Depression/anxiety

|                                                              | Didactic Year<br>Respondents         | Clinical Year<br>Respondents | p value     |      |
|--------------------------------------------------------------|--------------------------------------|------------------------------|-------------|------|
| <b>Over the last 2 weeks, how often has been bothered by</b> |                                      |                              |             |      |
| Little interest or pleasure in doing things                  |                                      |                              |             |      |
| Not at all (0 days)                                          | 36.9%                                | 40.9%                        |             |      |
| Several days (1-7 days)                                      | 44.1                                 | 40.9                         |             |      |
| More than half the days (8-11 days)                          | 13.9                                 | 13.9                         | .628        |      |
| Nearly every day (12-14 days)                                | 5.1                                  | 4.3                          |             |      |
| Feeling down, depressed, or hopeless                         |                                      |                              |             |      |
| Not at all (0 days)                                          | 39.3%                                | 40.6%                        |             |      |
| Several days (1-7 days)                                      | 40.7                                 | 39.1                         |             |      |
| More than half the days (8-11 days)                          | 14.7                                 | 14.8                         | .972        |      |
| Nearly every day (12-14 days)                                | 5.3                                  | 5.5                          |             |      |
|                                                              | PHQ-2 Mean Score (SD)                | 1.73 (1.56)                  | 1.67 (1.59) | .555 |
|                                                              | Probable Case of Depression [PHQ-2]: | 24.8%                        | 25.2%       | .885 |
| Feeling nervous, anxious, or on edge                         |                                      |                              |             |      |
| Not at all (0 days)                                          | 18.0%                                | 24.4%                        |             |      |
| Several days (1-7 days)                                      | 39.8                                 | 34.5                         |             |      |
| More than half the days (8-11 days)                          | 27.0                                 | 24.9                         | .091        |      |
| Nearly every day (12-14 days)                                | 15.2                                 | 16.2                         |             |      |
| Not being able to stop or control worrying                   |                                      |                              |             |      |
| Not at all (0 days)                                          | 39.0%                                | 42.6%                        |             |      |
| Several days (1-7 days)                                      | 36.2                                 | 32.8                         |             |      |
| More than half the days (8-11 days)                          | 16.2                                 | 15.9                         | .691        |      |
| Nearly every day (12-14 days)                                | 8.6                                  | 8.7                          |             |      |
|                                                              | GAD-2 Mean Score (SD)                | 2.34 (1.78)                  | 2.24 (1.86) | .415 |
|                                                              | Probable Case of Anxiety [GAD-2]:    | 40.8%                        | 40.0%       | .803 |

# Mental Health Status of Medical Students During the COVID-19 Pandemic

## Final Study Results

### Burnout

|                                                                                                       | Didactic Year Respondents | Clinical Year Respondents | $\rho$ value |
|-------------------------------------------------------------------------------------------------------|---------------------------|---------------------------|--------------|
| Degree of agreement with each of the statements on scale of 1 (totally disagree) to 7 (totally agree) |                           |                           |              |
| I think the dedication I invest in my studies is more than what I should for my health                |                           |                           |              |
| Mean (SD)                                                                                             | 4.27 (1.80)               | 4.07 (1.80)               | .100         |
| Percent Agreement                                                                                     | 51.1%                     | 42.9%                     | .082         |
| I neglect my personal life when I pursue important achievements in my studies                         |                           |                           |              |
| Mean (SD)                                                                                             | 5.08 (1.65)               | 4.95 (1.79)               | .266         |
| Percent Agreement                                                                                     | 74.5%                     | 68.5%                     | .366         |
| I risk my health when I pursue good results in my studies                                             |                           |                           |              |
| Mean (SD)                                                                                             | 4.38 (1.79)               | 4.51 (1.87)               | .316         |
| Percent Agreement                                                                                     | 57.0%                     | 57.7%                     | .433         |
| I overlook my own needs to fulfill academic demands                                                   |                           |                           |              |
| Mean (SD)                                                                                             | 4.95 (1.73)               | 4.98 (1.86)               | .808         |
| Percent Agreement                                                                                     | 71.0%                     | 72.0%                     | .137         |
| I would like to be pursuing a different career that is more challenging for my abilities              |                           |                           |              |
| Mean (SD)                                                                                             | 1.62 (1.07)               | 1.79 (1.30)               | .033         |
| Percent Agreement                                                                                     | 1.7%                      | 3.9%                      | .282         |
| I feel that my studies are an obstacle to the development of my abilities                             |                           |                           |              |
| Mean (SD)                                                                                             | 2.93 (1.65)               | 3.20 (1.84)               | .029         |
| Percent Agreement                                                                                     | 18.4%                     | 26.8%                     | .014         |
| I would like to be pursuing a different career where I can better develop my talents                  |                           |                           |              |
| Mean (SD)                                                                                             | 1.86 (1.36)               | 2.14 (1.51)               | .005         |
| Percent Agreement                                                                                     | 5.5%                      | 9.5%                      | .031         |
| My studies don't offer me opportunities to develop my abilities                                       |                           |                           |              |
| Mean (SD)                                                                                             | 2.58 (1.66)               | 2.65 (1.65)               | .504         |
| Percent Agreement                                                                                     | 16.1%                     | 15.2%                     | .700         |
| When things in school don't turn out as well as they should, I stop trying                            |                           |                           |              |
| Mean (SD)                                                                                             | 2.09 (1.40)               | 2.17 (1.43)               | .439         |
| Percent Agreement                                                                                     | 8.7%                      | 9.5%                      | .894         |
| I give up in response to difficulties in school                                                       |                           |                           |              |
| Mean (SD)                                                                                             | 1.84 (1.21)               | 1.84 (1.20)               | .940         |
| Percent Agreement                                                                                     | 5.0%                      | 5.1%                      | .935         |
| I give up in the face of any difficulties in my academic tasks                                        |                           |                           |              |
| Mean (SD)                                                                                             | 1.74 (1.16)               | 1.77 (1.18)               | .674         |
| Percent Agreement                                                                                     | 4.2%                      | 4.8%                      | .840         |
| When the effort I invest in school is not enough, I give up                                           |                           |                           |              |
| Mean (SD)                                                                                             | 1.90 (1.29)               | 1.92 (1.23)               | .813         |
| Percent Agreement                                                                                     | 6.7%                      | 6.3%                      | .854         |
| <u>Overload Dimension:</u>                                                                            |                           |                           |              |
| Mean Score (SD)                                                                                       | 12.92 (3.95)              | 13.02 (4.27)              | .722         |
| Percent Agreement                                                                                     | 13.7%                     | 19.6%                     | .018         |
| <u>Lack of Development Dimension:</u>                                                                 |                           |                           |              |
| Mean Score (SD)                                                                                       | 11.01 (3.56)              | 11.17 (3.91)              | .538         |
| Percent Agreement                                                                                     | 5.9%                      | 7.4%                      | .346         |
| <u>Neglect Dimension:</u>                                                                             |                           |                           |              |
| Mean Score (SD)                                                                                       | 11.30 (4.23)              | 11.79 (4.65)              | .116         |
| Percent Agreement                                                                                     | 11.2%                     | 13.7%                     | .267         |

# Mental Health Status of Medical Students During the COVID-19 Pandemic

## Final Study Results

### **Suicidal ideation**

|                                                                        | Didactic Year Respondents | Clinical Year Respondents | p value |
|------------------------------------------------------------------------|---------------------------|---------------------------|---------|
| Since March 2020, seriously considered harming self and/or taking life | 7.4%                      | 6.8%                      | .755    |

### **Substance Use**

|                                                                                                                          | Didactic Year Respondents | Clinical Year Respondents | p value |
|--------------------------------------------------------------------------------------------------------------------------|---------------------------|---------------------------|---------|
| Started or increased substance use (alcohol, marijuana, or other drugs) to cope with pandemic-related stress or emotions | 18.5%                     | 19.9%                     | .587    |

# Mental Health Status of Medical Students During the COVID-19 Pandemic Final Study Results

## Demographics

|           |             |
|-----------|-------------|
| White     | 605 (65.3%) |
| Non-White | 321 (34.7%) |

\* Excludes the 34 respondents whose race is unknown.

## Depression/anxiety

|                                                       | White<br>Respondents                 | Non-White<br>Respondents | p value     |      |
|-------------------------------------------------------|--------------------------------------|--------------------------|-------------|------|
| Over the last 2 weeks, how often has been bothered by |                                      |                          |             |      |
| Little interest or pleasure in doing things           |                                      |                          |             |      |
| Not at all (0 days)                                   | 41.2%                                | 32.1%                    |             |      |
| Several days (1-7 days)                               | 41.5                                 | 45.5                     |             |      |
| More than half the days (8-11 days)                   | 13.2                                 | 15.6                     | .027        |      |
| Nearly every day (12-14 days)                         | 4.1                                  | 6.8                      |             |      |
| Feeling down, depressed, or hopeless                  |                                      |                          |             |      |
| Not at all (0 days)                                   | 43.0%                                | 33.3%                    |             |      |
| Several days (1-7 days)                               | 38.5                                 | 42.7                     |             |      |
| More than half the days (8-11 days)                   | 13.7                                 | 16.8                     | .026        |      |
| Nearly every day (12-14 days)                         | 4.8                                  | 7.2                      |             |      |
|                                                       | PHQ-2 Mean Score (SD)                | 1.61 (1.56)              | 1.95 (1.61) | .002 |
|                                                       | Probable Case of Depression [PHQ-2]: | 23.0%                    | 29.3%       | .035 |
| Feeling nervous, anxious, or on edge                  |                                      |                          |             |      |
| Not at all (0 days)                                   | 19.5%                                | 20.2%                    |             |      |
| Several days (1-7 days)                               | 37.5                                 | 39.6                     |             |      |
| More than half the days (8-11 days)                   | 26.8                                 | 24.6                     | .869        |      |
| Nearly every day (12-14 days)                         | 16.2                                 | 15.6                     |             |      |
| Not being able to stop or control worrying            |                                      |                          |             |      |
| Not at all (0 days)                                   | 41.5%                                | 37.4%                    |             |      |
| Several days (1-7 days)                               | 35.4                                 | 34.6                     |             |      |
| More than half the days (8-11 days)                   | 15.2                                 | 17.7                     | .378        |      |
| Nearly every day (12-14 days)                         | 7.9                                  | 10.3                     |             |      |
|                                                       | GAD-2 Mean Score (SD)                | 2.29 (1.79)              | 2.36 (1.85) | .565 |
|                                                       | Probable Case of Anxiety [GAD-2]:    | 41.0%                    | 40.2%       | .812 |

# Mental Health Status of Medical Students During the COVID-19 Pandemic

## Final Study Results

### Burnout

|                                                                                                       | White Respondents | Non-White Respondents | p value |
|-------------------------------------------------------------------------------------------------------|-------------------|-----------------------|---------|
| Degree of agreement with each of the statements on scale of 1 (totally disagree) to 7 (totally agree) |                   |                       |         |
| I think the dedication I invest in my studies is more than what I should for my health                |                   |                       |         |
| Mean (SD)                                                                                             | 4.20 (1.80)       | 4.18 (1.80)           | .871    |
| Percent Agreement                                                                                     | 48.7%             | 47.0%                 | .870    |
| I neglect my personal life when I pursue important achievements in my studies                         |                   |                       |         |
| Mean (SD)                                                                                             | 4.99 (1.75)       | 5.13 (1.57)           | .249    |
| Percent Agreement                                                                                     | 71.4%             | 75.1%                 | .304    |
| I risk my health when I pursue good results in my studies                                             |                   |                       |         |
| Mean (SD)                                                                                             | 4.34 (1.87)       | 4.60 (1.68)           | .034    |
| Percent Agreement                                                                                     | 54.9%             | 62.5%                 | .120    |
| I overlook my own needs to fulfill academic demands                                                   |                   |                       |         |
| Mean (SD)                                                                                             | 4.93 (1.80)       | 5.02 (1.73)           | .510    |
| Percent Agreement                                                                                     | 71.2%             | 72.6%                 | .076    |
| I would like to be pursuing a different career that is more challenging for my abilities              |                   |                       |         |
| Mean (SD)                                                                                             | 1.57 (1.07)       | 1.85 (1.26)           | .001    |
| Percent Agreement                                                                                     | 1.9%              | 3.5%                  | .012    |
| I feel that my studies are an obstacle to the development of my abilities                             |                   |                       |         |
| Mean (SD)                                                                                             | 2.98 (1.75)       | 3.09 (1.68)           | .340    |
| Percent Agreement                                                                                     | 21.9%             | 20.5%                 | .101    |
| I would like to be pursuing a different career where I can better develop my talents                  |                   |                       |         |
| Mean (SD)                                                                                             | 1.80 (1.31)       | 2.23 (1.52)           | .000    |
| Percent Agreement                                                                                     | 5.1%              | 9.5%                  | .000    |
| My studies don't offer me opportunities to develop my abilities                                       |                   |                       |         |
| Mean (SD)                                                                                             | 2.52 (1.67)       | 2.71 (1.61)           | .111    |
| Percent Agreement                                                                                     | 15.3%             | 16.4%                 | .146    |
| When things in school don't turn out as well as they should, I stop trying                            |                   |                       |         |
| Mean (SD)                                                                                             | 1.99 (1.33)       | 2.30 (1.53)           | .002    |
| Percent Agreement                                                                                     | 7.9%              | 11.0%                 | .000    |
| I give up in response to difficulties in school                                                       |                   |                       |         |
| Mean (SD)                                                                                             | 1.71 (1.09)       | 2.04 (1.37)           | .000    |
| Percent Agreement                                                                                     | 3.4%              | 8.2%                  | .004    |
| I give up in the face of any difficulties in my academic tasks                                        |                   |                       |         |
| Mean (SD)                                                                                             | 1.61 (1.01)       | 1.96 (1.33)           | .000    |
| Percent Agreement                                                                                     | 2.7%              | 7.3%                  | .003    |
| When the effort I invest in school is not enough, I give up                                           |                   |                       |         |
| Mean (SD)                                                                                             | 1.77 (1.15)       | 2.09 (1.43)           | .001    |
| Percent Agreement                                                                                     | 4.9%              | 9.8%                  | .021    |
| <u>Overload Dimension:</u>                                                                            |                   |                       |         |
| Mean Score (SD)                                                                                       | 12.63 (4.01)      | 13.46 (4.10)          | .003    |
| Percent Agreement                                                                                     | 14.0%             | 18.9%                 | .050    |
| <u>Lack of Development Dimension:</u>                                                                 |                   |                       |         |
| Mean Score (SD)                                                                                       | 10.70 (3.56)      | 11.63 (3.69)          | .000    |
| Percent Agreement                                                                                     | 5.4%              | 7.9%                  | .138    |
| <u>Neglect Dimension:</u>                                                                             |                   |                       |         |
| Mean Score (SD)                                                                                       | 11.08 (4.33)      | 12.08 (4.35)          | .001    |
| Percent Agreement                                                                                     | 10.4%             | 14.5%                 | .070    |



# Mental Health Status of Medical Students During the COVID-19 Pandemic

## Final Study Results

### **Suicidal ideation**

|                                                                        | White Respondents | Non-White Respondents | p value |
|------------------------------------------------------------------------|-------------------|-----------------------|---------|
| Since March 2020, seriously considered harming self and/or taking life | 6.1%              | 9.2%                  | .083    |

### **Substance Use**

|                                                                                                                          | White Respondents | Non-White Respondents | p value |
|--------------------------------------------------------------------------------------------------------------------------|-------------------|-----------------------|---------|
| Started or increased substance use (alcohol, marijuana, or other drugs) to cope with pandemic-related stress or emotions | 20.1%             | 16.5%                 | .185    |

# Mental Health Status of Medical Students During the COVID-19 Pandemic Final Study Results

## Demographics

|        |             |
|--------|-------------|
| Male   | 377 (39.6%) |
| Female | 575 (60.4%) |

\* Excludes the 8 non-binary respondent.

## Depression/anxiety

|                                                       | Male Respondents | Female Respondents | p value |
|-------------------------------------------------------|------------------|--------------------|---------|
| Over the last 2 weeks, how often has been bothered by |                  |                    |         |
| Little interest or pleasure in doing things           |                  |                    |         |
| Not at all (0 days)                                   | 42.4%            | 35.8%              | .096    |
| Several days (1-7 days)                               | 41.7             | 43.3               |         |
| More than half the days (8-11 days)                   | 11.1             | 15.8               |         |
| Nearly every day (12-14 days)                         | 4.8              | 5.1                |         |
| Feeling down, depressed, or hopeless                  |                  |                    |         |
| Not at all (0 days)                                   | 47.5%            | 35.0%              | .002    |
| Several days (1-7 days)                               | 36.1             | 42.8               |         |
| More than half the days (8-11 days)                   | 12.2             | 16.1               |         |
| Nearly every day (12-14 days)                         | 4.2              | 6.1                |         |
| PHQ-2 Mean Score (SD)                                 | 1.51 (1.55)      | 1.83 (1.58)        | .002    |
| Probable Case of Depression [PHQ-2]:                  | 20.4%            | 27.8%              | .010    |
| Feeling nervous, anxious, or on edge                  |                  |                    |         |
| Not at all (0 days)                                   | 28.4%            | 15.0%              | .000    |
| Several days (1-7 days)                               | 39.8             | 37.0               |         |
| More than half the days (8-11 days)                   | 20.7             | 29.7               |         |
| Nearly every day (12-14 days)                         | 11.1             | 18.3               |         |
| Not being able to stop or control worrying            |                  |                    |         |
| Not at all (0 days)                                   | 50.4%            | 33.4%              | .000    |
| Several days (1-7 days)                               | 35.0             | 35.5               |         |
| More than half the days (8-11 days)                   | 9.0              | 20.7               |         |
| Nearly every day (12-14 days)                         | 5.6              | 10.4               |         |
| GAD-2 Mean Score (SD)                                 | 1.84 (1.70)      | 2.59 (1.80)        | .000    |
| Probable Case of Anxiety [GAD-2]:                     | 30.8%            | 46.6%              | .000    |

# Mental Health Status of Medical Students During the COVID-19 Pandemic

## Final Study Results

### Burnout

|                                                                                                       | Male Respondents | Female Respondents | p value |
|-------------------------------------------------------------------------------------------------------|------------------|--------------------|---------|
| Degree of agreement with each of the statements on scale of 1 (totally disagree) to 7 (totally agree) |                  |                    |         |
| I think the dedication I invest in my studies is more than what I should for my health                |                  |                    |         |
| Mean (SD)                                                                                             | 4.05 (1.86)      | 4.27 (1.76)        | .067    |
| Percent Agreement                                                                                     | 43.8%            | 50.6%              | .028    |
| I neglect my personal life when I pursue important achievements in my studies                         |                  |                    |         |
| Mean (SD)                                                                                             | 4.69 (1.82)      | 5.26 (1.58)        | .000    |
| Percent Agreement                                                                                     | 65.1%            | 77.0%              | .000    |
| I risk my health when I pursue good results in my studies                                             |                  |                    |         |
| Mean (SD)                                                                                             | 4.25 (1.91)      | 4.54 (1.74)        | .019    |
| Percent Agreement                                                                                     | 53.2%            | 59.6%              | .100    |
| I overlook my own needs to fulfill academic demands                                                   |                  |                    |         |
| Mean (SD)                                                                                             | 4.69 (1.86)      | 5.14 (1.69)        | .000    |
| Percent Agreement                                                                                     | 65.7%            | 75.4%              | .000    |
| I would like to be pursuing a different career that is more challenging for my abilities              |                  |                    |         |
| Mean (SD)                                                                                             | 1.84 (1.26)      | 1.57 (1.06)        | .001    |
| Percent Agreement                                                                                     | 3.5%             | 1.6%               | .017    |
| I feel that my studies are an obstacle to the development of my abilities                             |                  |                    |         |
| Mean (SD)                                                                                             | 3.15 (1.73)      | 2.94 (1.71)        | .060    |
| Percent Agreement                                                                                     | 23.0%            | 20.2%              | .533    |
| I would like to be pursuing a different career where I can better develop my talents                  |                  |                    |         |
| Mean (SD)                                                                                             | 2.16 (1.51)      | 1.83 (1.34)        | .001    |
| Percent Agreement                                                                                     | 9.2%             | 5.3%               | .019    |
| My studies don't offer me opportunities to develop my abilities                                       |                  |                    |         |
| Mean (SD)                                                                                             | 2.75 (1.64)      | 2.51 (1.66)        | .026    |
| Percent Agreement                                                                                     | 17.6%            | 14.7%              | .096    |
| When things in school don't turn out as well as they should, I stop trying                            |                  |                    |         |
| Mean (SD)                                                                                             | 2.07 (1.38)      | 2.15 (1.43)        | .407    |
| Percent Agreement                                                                                     | 9.5%             | 8.7%               | .280    |
| I give up in response to difficulties in school                                                       |                  |                    |         |
| Mean (SD)                                                                                             | 1.74 (1.10)      | 1.89 (1.24)        | .055    |
| Percent Agreement                                                                                     | 4.1%             | 5.3%               | .131    |
| I give up in the face of any difficulties in my academic tasks                                        |                  |                    |         |
| Mean (SD)                                                                                             | 1.61 (1.05)      | 1.82 (1.21)        | .005    |
| Percent Agreement                                                                                     | 3.5%             | 4.6%               | .035    |
| When the effort I invest in school is not enough, I give up                                           |                  |                    |         |
| Mean (SD)                                                                                             | 1.76 (1.17)      | 1.98 (1.32)        | .009    |
| Percent Agreement                                                                                     | 5.7%             | 7.1%               | .008    |
| <u>Overload Dimension:</u>                                                                            |                  |                    |         |
| Mean Score (SD)                                                                                       | 12.64 (4.41)     | 13.14 (3.79)       | .076    |
| Percent Agreement                                                                                     | 15.9%            | 15.2%              | .765    |
| <u>Lack of Development Dimension:</u>                                                                 |                  |                    |         |
| Mean Score (SD)                                                                                       | 10.89 (3.85)     | 11.16 (3.54)       | .282    |
| Percent Agreement                                                                                     | 6.2%             | 6.2%               | .989    |
| <u>Neglect Dimension:</u>                                                                             |                  |                    |         |
| Mean Score (SD)                                                                                       | 11.24 (4.43)     | 11.61 (4.35)       | .202    |
| Percent Agreement                                                                                     | 11.9%            | 11.9%              | .988    |

# Mental Health Status of Medical Students During the COVID-19 Pandemic

## Final Study Results

### **Suicidal ideation**

|                                                                        | Male Respondents | Female Respondents | p value |
|------------------------------------------------------------------------|------------------|--------------------|---------|
| Since March 2020, seriously considered harming self and/or taking life | 6.0%             | 7.8%               | .284    |

### **Substance Use**

|                                                                                                                          | Male Respondents | Female Respondents | p value |
|--------------------------------------------------------------------------------------------------------------------------|------------------|--------------------|---------|
| Started or increased substance use (alcohol, marijuana, or other drugs) to cope with pandemic-related stress or emotions | 16.0%            | 20.4%              | .092    |

# Mental Health Status of Medical Students During the COVID-19 Pandemic Final Study Results

## Demographics

|                                   |             |
|-----------------------------------|-------------|
| Never accessed mental health care | 451 (47.9%) |
| Has accessed mental health care   | 490 (52.1%) |

## Depression/anxiety

|                                                              | Never accessed<br>mental health<br>care Respondents | Has accessed<br>mental health<br>care Respondents | p value |
|--------------------------------------------------------------|-----------------------------------------------------|---------------------------------------------------|---------|
| <b>Over the last 2 weeks, how often has been bothered by</b> |                                                     |                                                   |         |
| <b>Little interest or pleasure in doing things</b>           |                                                     |                                                   |         |
| Not at all (0 days)                                          | 48.1%                                               | 29.8%                                             |         |
| Several days (1-7 days)                                      | 41.3                                                | 43.9                                              |         |
| More than half the days (8-11 days)                          | 8.4                                                 | 18.8                                              | .000    |
| Nearly every day (12-14 days)                                | 2.2                                                 | 7.5                                               |         |
| <b>Feeling down, depressed, or hopeless</b>                  |                                                     |                                                   |         |
| Not at all (0 days)                                          | 51.5%                                               | 29.6%                                             |         |
| Several days (1-7 days)                                      | 35.0                                                | 44.5                                              |         |
| More than half the days (8-11 days)                          | 11.3                                                | 17.5                                              | .000    |
| Nearly every day (12-14 days)                                | 2.2                                                 | 8.4                                               |         |
| PHQ-2 Mean Score (SD)                                        | 1.29 (1.37)                                         | 2.09 (1.65)                                       | .000    |
| Probable Case of Depression [PHQ-2]:                         | 15.7%                                               | 33.5%                                             | .000    |
| <b>Feeling nervous, anxious, or on edge</b>                  |                                                     |                                                   |         |
| Not at all (0 days)                                          | 29.0%                                               | 12.5%                                             |         |
| Several days (1-7 days)                                      | 40.4                                                | 36.1                                              |         |
| More than half the days (8-11 days)                          | 19.7                                                | 31.4                                              | .000    |
| Nearly every day (12-14 days)                                | 10.9                                                | 20.0                                              |         |
| <b>Not being able to stop or control worrying</b>            |                                                     |                                                   |         |
| Not at all (0 days)                                          | 50.1%                                               | 31.4%                                             |         |
| Several days (1-7 days)                                      | 34.2                                                | 35.7                                              |         |
| More than half the days (8-11 days)                          | 10.6                                                | 21.0                                              | .000    |
| Nearly every day (12-14 days)                                | 5.1                                                 | 11.9                                              |         |
| GAD-2 Mean Score (SD)                                        | 1.83 (1.69)                                         | 2.72 (1.81)                                       | .000    |
| Probable Case of Anxiety [GAD-2]:                            | 29.7%                                               | 49.8%                                             | .000    |

# Mental Health Status of Medical Students During the COVID-19 Pandemic

## Final Study Results

### Burnout

|                                                                                                          | Never accessed<br>mental health<br>care Respondents | Has accessed<br>mental health<br>care Respondents | p value |
|----------------------------------------------------------------------------------------------------------|-----------------------------------------------------|---------------------------------------------------|---------|
| Degree of agreement with each of the statements on scale<br>of 1 (totally disagree) to 7 (totally agree) |                                                     |                                                   |         |
| I think the dedication I invest in my studies is more than what I should for my health                   |                                                     |                                                   |         |
| Mean (SD)                                                                                                | 4.06 (1.77)                                         | 4.31 (1.82)                                       | .034    |
| Percent Agreement                                                                                        | 43.5%                                               | 52.0%                                             | .160    |
| I neglect my personal life when I pursue important achievements in my studies                            |                                                     |                                                   |         |
| Mean (SD)                                                                                                | 4.75 (1.75)                                         | 5.29 (1.61)                                       | .000    |
| Percent Agreement                                                                                        | 66.3%                                               | 78.0%                                             | .000    |
| I risk my health when I pursue good results in my studies                                                |                                                     |                                                   |         |
| Mean (SD)                                                                                                | 4.04 (1.80)                                         | 4.79 (1.76)                                       | .000    |
| Percent Agreement                                                                                        | 48.1%                                               | 65.7%                                             | .000    |
| I overlook my own needs to fulfill academic demands                                                      |                                                     |                                                   |         |
| Mean (SD)                                                                                                | 4.67 (1.78)                                         | 5.24 (1.72)                                       | .000    |
| Percent Agreement                                                                                        | 66.5%                                               | 76.1%                                             | .000    |
| I would like to be pursuing a different career that is more challenging for my abilities                 |                                                     |                                                   |         |
| Mean (SD)                                                                                                | 1.68 (1.15)                                         | 1.68 (1.17)                                       | .945    |
| Percent Agreement                                                                                        | 2.7%                                                | 2.2%                                              | .878    |
| I feel that my studies are an obstacle to the development of my abilities                                |                                                     |                                                   |         |
| Mean (SD)                                                                                                | 2.79 (1.64)                                         | 3.24 (1.77)                                       | .000    |
| Percent Agreement                                                                                        | 16.2%                                               | 26.1%                                             | .001    |
| I would like to be pursuing a different career where I can better develop my talents                     |                                                     |                                                   |         |
| Mean (SD)                                                                                                | 1.86 (1.33)                                         | 2.04 (1.47)                                       | .057    |
| Percent Agreement                                                                                        | 6.0%                                                | 7.3%                                              | .391    |
| My studies don't offer me opportunities to develop my abilities                                          |                                                     |                                                   |         |
| Mean (SD)                                                                                                | 2.35 (1.48)                                         | 2.82 (1.77)                                       | .000    |
| Percent Agreement                                                                                        | 11.3%                                               | 19.8%                                             | .000    |
| When things in school don't turn out as well as they should, I stop trying                               |                                                     |                                                   |         |
| Mean (SD)                                                                                                | 1.98 (1.30)                                         | 2.23 (1.49)                                       | .007    |
| Percent Agreement                                                                                        | 7.3%                                                | 10.4%                                             | .129    |
| I give up in response to difficulties in school                                                          |                                                     |                                                   |         |
| Mean (SD)                                                                                                | 1.72 (1.12)                                         | 1.95 (1.27)                                       | .004    |
| Percent Agreement                                                                                        | 4.0%                                                | 5.9%                                              | .039    |
| I give up in the face of any difficulties in my academic tasks                                           |                                                     |                                                   |         |
| Mean (SD)                                                                                                | 1.63 (1.05)                                         | 1.87 (1.25)                                       | .002    |
| Percent Agreement                                                                                        | 3.5%                                                | 5.1%                                              | .008    |
| When the effort I invest in school is not enough, I give up                                              |                                                     |                                                   |         |
| Mean (SD)                                                                                                | 1.76 (1.13)                                         | 2.03 (1.36)                                       | .001    |
| Percent Agreement                                                                                        | 4.9%                                                | 8.0%                                              | .004    |
| <u>Overload Dimension:</u>                                                                               |                                                     |                                                   |         |
| Mean Score (SD)                                                                                          | 12.31 (4.08)                                        | 13.53 (3.94)                                      | .000    |
| Percent Agreement                                                                                        | 12.0%                                               | 19.2%                                             | .002    |
| <u>Lack of Development Dimension:</u>                                                                    |                                                     |                                                   |         |
| Mean Score (SD)                                                                                          | 10.41 (3.55)                                        | 11.67 (3.71)                                      | .000    |
| Percent Agreement                                                                                        | 4.2%                                                | 8.6%                                              | .007    |
| <u>Neglect Dimension:</u>                                                                                |                                                     |                                                   |         |
| Mean Score (SD)                                                                                          | 10.57 (4.04)                                        | 12.29 (4.54)                                      | .000    |
| Percent Agreement                                                                                        | 6.7%                                                | 16.9%                                             | .000    |

# Mental Health Status of Medical Students During the COVID-19 Pandemic

## Final Study Results

### **Suicidal ideation**

|                                                                           | Never accessed<br>mental health<br>care Respondents | Has accessed<br>mental health<br>care Respondents | p value |
|---------------------------------------------------------------------------|-----------------------------------------------------|---------------------------------------------------|---------|
| Since March 2020, seriously considered harming self<br>and/or taking life | 2.9%                                                | 11.2%                                             | .000    |

### **Substance Use**

|                                                                                                                                | Never accessed<br>mental health<br>care Respondents | Has accessed<br>mental health<br>care Respondents | p value |
|--------------------------------------------------------------------------------------------------------------------------------|-----------------------------------------------------|---------------------------------------------------|---------|
| Started or increased substance use (alcohol, marijuana,<br>or other drugs) to cope with pandemic-related stress<br>or emotions | 12.2%                                               | 25.3%                                             | .000    |

# Mental Health Status of Medical Students During the COVID-19 Pandemic Final Study Results

## Demographics

|                    |             |
|--------------------|-------------|
| COVID diagnosis    | 80 ( 8.3%)  |
| no COVID diagnosis | 880 (91.7%) |

## Depression/anxiety

|                                                              | COVID diagnosis<br>Respondents | no COVID diagnosis<br>Respondents | p value |
|--------------------------------------------------------------|--------------------------------|-----------------------------------|---------|
| <b>Over the last 2 weeks, how often has been bothered by</b> |                                |                                   |         |
| <b>Little interest or pleasure in doing things</b>           |                                |                                   |         |
| Not at all (0 days)                                          | 42.5%                          | 37.8%                             |         |
| Several days (1-7 days)                                      | 36.3                           | 43.4                              |         |
| More than half the days (8-11 days)                          | 16.2                           | 13.8                              | .654    |
| Nearly every day (12-14 days)                                | 5.0                            | 5.0                               |         |
| <b>Feeling down, depressed, or hopeless</b>                  |                                |                                   |         |
| Not at all (0 days)                                          | 41.3%                          | 39.5%                             |         |
| Several days (1-7 days)                                      | 35.0                           | 40.6                              |         |
| More than half the days (8-11 days)                          | 15.0                           | 14.7                              | .517    |
| Nearly every day (12-14 days)                                | 8.7                            | 5.2                               |         |
| PHQ-2 Mean Score (SD)                                        | 1.75 (1.75)                    | 1.71 (1.56)                       | .849    |
| Probable Case of Depression [PHQ-2]:                         | 26.3%                          | 25.0%                             | .805    |
| <b>Feeling nervous, anxious, or on edge</b>                  |                                |                                   |         |
| Not at all (0 days)                                          | 28.8%                          | 19.3%                             |         |
| Several days (1-7 days)                                      | 26.2                           | 39.3                              |         |
| More than half the days (8-11 days)                          | 20.0                           | 26.6                              | .005    |
| Nearly every day (12-14 days)                                | 25.0                           | 14.8                              |         |
| <b>Not being able to stop or control worrying</b>            |                                |                                   |         |
| Not at all (0 days)                                          | 40.0%                          | 40.1%                             |         |
| Several days (1-7 days)                                      | 36.3                           | 35.1                              |         |
| More than half the days (8-11 days)                          | 11.2                           | 16.5                              | .428    |
| Nearly every day (12-14 days)                                | 12.5                           | 8.3                               |         |
| GAD-2 Mean Score (SD)                                        | 2.38 (2.03)                    | 2.30 (1.78)                       | .714    |
| Probable Case of Anxiety [GAD-2]:                            | 40.0%                          | 40.5%                             | .937    |



# Mental Health Status of Medical Students During the COVID-19 Pandemic

## Final Study Results

### Burnout

|                                                                                                          |                   | COVID diagnosis<br>Respondents | no COVID diagnosis<br>Respondents | p value |
|----------------------------------------------------------------------------------------------------------|-------------------|--------------------------------|-----------------------------------|---------|
| Degree of agreement with each of the statements on scale<br>of 1 (totally disagree) to 7 (totally agree) |                   |                                |                                   |         |
| I think the dedication I invest in my studies is more than what I should for my health                   |                   |                                |                                   |         |
|                                                                                                          | Mean (SD)         | 4.19 (1.84)                    | 4.19 (1.80)                       | .973    |
|                                                                                                          | Percent Agreement | 51.3%                          | 47.7%                             | .391    |
| I neglect my personal life when I pursue important achievements in my studies                            |                   |                                |                                   |         |
|                                                                                                          | Mean (SD)         | 5.10 (1.76)                    | 5.03 (1.69)                       | .720    |
|                                                                                                          | Percent Agreement | 78.8%                          | 71.8%                             | .282    |
| I risk my health when I pursue good results in my studies                                                |                   |                                |                                   |         |
|                                                                                                          | Mean (SD)         | 4.44 (1.99)                    | 4.43 (1.80)                       | .958    |
|                                                                                                          | Percent Agreement | 57.5%                          | 57.1%                             | .135    |
| I overlook my own needs to fulfill academic demands                                                      |                   |                                |                                   |         |
|                                                                                                          | Mean (SD)         | 5.04 (1.74)                    | 4.96 (1.78)                       | .711    |
|                                                                                                          | Percent Agreement | 72.5%                          | 71.5%                             | .687    |
| I would like to be pursuing a different career that is more challenging for my abilities                 |                   |                                |                                   |         |
|                                                                                                          | Mean (SD)         | 1.79 (1.35)                    | 1.67 (1.14)                       | .405    |
|                                                                                                          | Percent Agreement | 3.8%                           | 2.3%                              | .749    |
| I feel that my studies are an obstacle to the development of my abilities                                |                   |                                |                                   |         |
|                                                                                                          | Mean (SD)         | 3.08 (1.83)                    | 3.03 (1.72)                       | .806    |
|                                                                                                          | Percent Agreement | 25.0%                          | 21.1%                             | .845    |
| I would like to be pursuing a different career where I can better develop my talents                     |                   |                                |                                   |         |
|                                                                                                          | Mean (SD)         | 2.18 (1.64)                    | 1.94 (1.39)                       | .228    |
|                                                                                                          | Percent Agreement | 8.8%                           | 6.7%                              | .414    |
| My studies don't offer me opportunities to develop my abilities                                          |                   |                                |                                   |         |
|                                                                                                          | Mean (SD)         | 2.75 (1.80)                    | 2.59 (1.64)                       | .401    |
|                                                                                                          | Percent Agreement | 20.0%                          | 15.4%                             | .670    |
| When things in school don't turn out as well as they should, I stop trying                               |                   |                                |                                   |         |
|                                                                                                          | Mean (SD)         | 2.09 (1.54)                    | 2.12 (1.40)                       | .852    |
|                                                                                                          | Percent Agreement | 11.3%                          | 8.7%                              | .711    |
| I give up in response to difficulties in school                                                          |                   |                                |                                   |         |
|                                                                                                          | Mean (SD)         | 1.96 (1.42)                    | 1.83 (1.18)                       | .341    |
|                                                                                                          | Percent Agreement | 8.8%                           | 4.6%                              | .040    |
| I give up in the face of any difficulties in my academic tasks                                           |                   |                                |                                   |         |
|                                                                                                          | Mean (SD)         | 1.83 (1.30)                    | 1.74 (1.15)                       | .551    |
|                                                                                                          | Percent Agreement | 7.5%                           | 4.1%                              | .059    |
| When the effort I invest in school is not enough, I give up                                              |                   |                                |                                   |         |
|                                                                                                          | Mean (SD)         | 1.93 (1.33)                    | 1.90 (1.26)                       | .849    |
|                                                                                                          | Percent Agreement | 7.5%                           | 6.4%                              | .463    |
| <u>Overload Dimension:</u>                                                                               |                   |                                |                                   |         |
|                                                                                                          | Mean Score (SD)   | 13.36 (4.16)                   | 12.93 (4.06)                      | .461    |
|                                                                                                          | Percent Agreement | 20.0%                          | 15.5%                             | .295    |
| <u>Lack of Development Dimension:</u>                                                                    |                   |                                |                                   |         |
|                                                                                                          | Mean Score (SD)   | 11.46 (3.76)                   | 11.03 (3.68)                      | .321    |
|                                                                                                          | Percent Agreement | 7.5%                           | 6.4%                              | .695    |
| <u>Neglect Dimension:</u>                                                                                |                   |                                |                                   |         |
|                                                                                                          | Mean Score (SD)   | 11.53 (4.56)                   | 11.47 (4.37)                      | .910    |
|                                                                                                          | Percent Agreement | 13.8%                          | 11.8%                             | .611    |

# Mental Health Status of Medical Students During the COVID-19 Pandemic

## Final Study Results

### **Suicidal ideation**

|                                                                           | COVID diagnosis<br>Respondents | no COVID diagnosis<br>Respondents | p value |
|---------------------------------------------------------------------------|--------------------------------|-----------------------------------|---------|
| Since March 2020, seriously considered harming self<br>and/or taking life | 8.8%                           | 7.1%                              | .582    |

### **Substance Use**

|                                                                                                                                | COVID diagnosis<br>Respondents | no COVID diagnosis<br>Respondents | p value |
|--------------------------------------------------------------------------------------------------------------------------------|--------------------------------|-----------------------------------|---------|
| Started or increased substance use (alcohol, marijuana,<br>or other drugs) to cope with pandemic-related stress<br>or emotions | 32.5%                          | 17.8%                             | .001    |

# Mental Health Status of Medical Students During the COVID-19 Pandemic Final Study Results

## Demographics

|                                   |             |
|-----------------------------------|-------------|
| Loved one diagnosed with COVID    | 581 (60.5%) |
| No loved one diagnosed with COVID | 379 (39.5%) |

## Depression/anxiety

|                                                              | Loved one<br>diagnosed with<br>COVID | No loved one<br>diagnosed with<br>COVID | p value     |      |
|--------------------------------------------------------------|--------------------------------------|-----------------------------------------|-------------|------|
| <b>Over the last 2 weeks, how often has been bothered by</b> |                                      |                                         |             |      |
| Little interest or pleasure in doing things                  |                                      |                                         |             |      |
| Not at all (0 days)                                          | 36.0%                                | 41.7%                                   |             |      |
| Several days (1-7 days)                                      | 44.4                                 | 40.4                                    |             |      |
| More than half the days (8-11 days)                          | 14.4                                 | 13.2                                    | .365        |      |
| Nearly every day (12-14 days)                                | 5.2                                  | 4.7                                     |             |      |
| Feeling down, depressed, or hopeless                         |                                      |                                         |             |      |
| Not at all (0 days)                                          | 38.6%                                | 41.4%                                   |             |      |
| Several days (1-7 days)                                      | 39.9                                 | 40.4                                    |             |      |
| More than half the days (8-11 days)                          | 16.0                                 | 12.7                                    | .526        |      |
| Nearly every day (12-14 days)                                | 5.5                                  | 5.5                                     |             |      |
|                                                              | PHQ-2 Mean Score (SD)                | 1.77 (1.60)                             | 1.63 (1.55) | .181 |
|                                                              | Probable Case of Depression [PHQ-2]: | 25.8%                                   | 24.0%       | .528 |
| Feeling nervous, anxious, or on edge                         |                                      |                                         |             |      |
| Not at all (0 days)                                          | 20.1%                                | 20.0%                                   |             |      |
| Several days (1-7 days)                                      | 37.0                                 | 40.1                                    |             |      |
| More than half the days (8-11 days)                          | 25.8                                 | 26.4                                    | .477        |      |
| Nearly every day (12-14 days)                                | 17.1                                 | 13.5                                    |             |      |
| Not being able to stop or control worrying                   |                                      |                                         |             |      |
| Not at all (0 days)                                          | 39.4%                                | 41.2%                                   |             |      |
| Several days (1-7 days)                                      | 33.9                                 | 37.2                                    |             |      |
| More than half the days (8-11 days)                          | 16.5                                 | 15.3                                    | .174        |      |
| Nearly every day (12-14 days)                                | 10.2                                 | 6.3                                     |             |      |
|                                                              | GAD-2 Mean Score (SD)                | 2.37 (1.85)                             | 2.20 (1.73) | .151 |
|                                                              | Probable Case of Anxiety [GAD-2]:    | 41.3%                                   | 39.1%       | .486 |

# Mental Health Status of Medical Students During the COVID-19 Pandemic

## Final Study Results

### Burnout

|                                                                                                          | Loved one<br>diagnosed with<br>COVID | No loved one<br>diagnosed with<br>COVID | p value |
|----------------------------------------------------------------------------------------------------------|--------------------------------------|-----------------------------------------|---------|
| Degree of agreement with each of the statements on scale<br>of 1 (totally disagree) to 7 (totally agree) |                                      |                                         |         |
| I think the dedication I invest in my studies is more than what I should for my health                   |                                      |                                         |         |
| Mean (SD)                                                                                                | 4.23 (1.81)                          | 4.14 (1.80)                             | .497    |
| Percent Agreement                                                                                        | 50.7%                                | 44.0%                                   | .135    |
| I neglect my personal life when I pursue important achievements in my studies                            |                                      |                                         |         |
| Mean (SD)                                                                                                | 5.12 (1.63)                          | 4.91 (1.78)                             | .070    |
| Percent Agreement                                                                                        | 74.7%                                | 68.9%                                   | .286    |
| I risk my health when I pursue good results in my studies                                                |                                      |                                         |         |
| Mean (SD)                                                                                                | 4.50 (1.78)                          | 4.32 (1.87)                             | .129    |
| Percent Agreement                                                                                        | 58.4%                                | 55.2%                                   | .268    |
| I overlook my own needs to fulfill academic demands                                                      |                                      |                                         |         |
| Mean (SD)                                                                                                | 5.07 (1.72)                          | 4.80 (1.84)                             | .024    |
| Percent Agreement                                                                                        | 74.6%                                | 67.0%                                   | .197    |
| I would like to be pursuing a different career that is more challenging for my abilities                 |                                      |                                         |         |
| Mean (SD)                                                                                                | 1.62 (1.12)                          | 1.78 (1.21)                             | .040    |
| Percent Agreement                                                                                        | 2.3%                                 | 2.7%                                    | .230    |
| I feel that my studies are an obstacle to the development of my abilities                                |                                      |                                         |         |
| Mean (SD)                                                                                                | 2.98 (1.70)                          | 3.10 (1.77)                             | .317    |
| Percent Agreement                                                                                        | 20.5%                                | 22.8%                                   | .681    |
| I would like to be pursuing a different career where I can better develop my talents                     |                                      |                                         |         |
| Mean (SD)                                                                                                | 1.87 (1.34)                          | 2.10 (1.52)                             | .018    |
| Percent Agreement                                                                                        | 5.1%                                 | 9.7%                                    | .039    |
| My studies don't offer me opportunities to develop my abilities                                          |                                      |                                         |         |
| Mean (SD)                                                                                                | 2.53 (1.62)                          | 2.71 (1.71)                             | .093    |
| Percent Agreement                                                                                        | 14.2%                                | 18.2%                                   | .385    |
| When things in school don't turn out as well as they should, I stop trying                               |                                      |                                         |         |
| Mean (SD)                                                                                                | 2.10 (1.37)                          | 2.14 (1.47)                             | .710    |
| Percent Agreement                                                                                        | 8.1%                                 | 10.2%                                   | .700    |
| I give up in response to difficulties in school                                                          |                                      |                                         |         |
| Mean (SD)                                                                                                | 1.81 (1.19)                          | 1.89 (1.23)                             | .300    |
| Percent Agreement                                                                                        | 5.1%                                 | 4.8%                                    | .830    |
| I give up in the face of any difficulties in my academic tasks                                           |                                      |                                         |         |
| Mean (SD)                                                                                                | 1.73 (1.15)                          | 1.78 (1.18)                             | .530    |
| Percent Agreement                                                                                        | 4.4%                                 | 4.3%                                    | .765    |
| When the effort I invest in school is not enough, I give up                                              |                                      |                                         |         |
| Mean (SD)                                                                                                | 1.89 (1.26)                          | 1.91 (1.27)                             | .769    |
| Percent Agreement                                                                                        | 6.3%                                 | 6.7%                                    | .971    |
| <u>Overload Dimension:</u>                                                                               |                                      |                                         |         |
| Mean Score (SD)                                                                                          | 12.98 (3.88)                         | 12.94 (4.34)                            | .886    |
| Percent Agreement                                                                                        | 14.4%                                | 18.2%                                   | .114    |
| <u>Lack of Development Dimension:</u>                                                                    |                                      |                                         |         |
| Mean Score (SD)                                                                                          | 11.00 (3.54)                         | 11.18 (3.90)                            | .454    |
| Percent Agreement                                                                                        | 5.1%                                 | 8.6%                                    | .033    |
| <u>Neglect Dimension:</u>                                                                                |                                      |                                         |         |
| Mean Score (SD)                                                                                          | 11.48 (4.28)                         | 11.47 (4.54)                            | .976    |
| Percent Agreement                                                                                        | 12.3%                                | 11.5%                                   | .728    |

# Mental Health Status of Medical Students During the COVID-19 Pandemic

## Final Study Results

### **Suicidal ideation**

|                                                                        | Loved one diagnosed with COVID | No loved one diagnosed with COVID | p value |
|------------------------------------------------------------------------|--------------------------------|-----------------------------------|---------|
| Since March 2020, seriously considered harming self and/or taking life | 7.7%                           | 6.4%                              | .447    |

### **Substance Use**

|                                                                                                                          | Loved one diagnosed with COVID | No loved one diagnosed with COVID | p value |
|--------------------------------------------------------------------------------------------------------------------------|--------------------------------|-----------------------------------|---------|
| Started or increased substance use (alcohol, marijuana, or other drugs) to cope with pandemic-related stress or emotions | 20.6%                          | 16.6%                             | .128    |

# Mental Health Status of Medical Students During the COVID-19 Pandemic Final Study Results

## Demographics

|                                           |             |
|-------------------------------------------|-------------|
| Know someone who has died of COVID        | 237 (24.7%) |
| Do not know someone who has died of COVID | 723 (75.3%) |

## Depression/anxiety

|                                                              | Know someone<br>who has died of<br>COVID | Do not know<br>someone who has<br>died of COVID | p value |
|--------------------------------------------------------------|------------------------------------------|-------------------------------------------------|---------|
| <b>Over the last 2 weeks, how often has been bothered by</b> |                                          |                                                 |         |
| Little interest or pleasure in doing things                  |                                          |                                                 |         |
| Not at all (0 days)                                          | 30.8%                                    | 40.7%                                           |         |
| Several days (1-7 days)                                      | 45.2                                     | 42.0                                            |         |
| More than half the days (8-11 days)                          | 17.7                                     | 12.7                                            | .026    |
| Nearly every day (12-14 days)                                | 6.3                                      | 4.6                                             |         |
| Feeling down, depressed, or hopeless                         |                                          |                                                 |         |
| Not at all (0 days)                                          | 28.3%                                    | 43.4%                                           |         |
| Several days (1-7 days)                                      | 43.0                                     | 39.1                                            |         |
| More than half the days (8-11 days)                          | 21.5                                     | 12.5                                            | .000    |
| Nearly every day (12-14 days)                                | 7.2                                      | 5.0                                             |         |
| PHQ-2 Mean Score (SD)                                        | 2.07 (1.64)                              | 1.60 (1.54)                                     | .000    |
| Probable Case of Depression [PHQ-2]:                         | 33.8%                                    | 22.3%                                           | .000    |
| Feeling nervous, anxious, or on edge                         |                                          |                                                 |         |
| Not at all (0 days)                                          | 18.1%                                    | 20.7%                                           |         |
| Several days (1-7 days)                                      | 33.8                                     | 39.7                                            |         |
| More than half the days (8-11 days)                          | 24.9                                     | 26.4                                            | .003    |
| Nearly every day (12-14 days)                                | 23.2                                     | 13.1                                            |         |
| Not being able to stop or control worrying                   |                                          |                                                 |         |
| Not at all (0 days)                                          | 33.3%                                    | 42.3%                                           |         |
| Several days (1-7 days)                                      | 32.1                                     | 36.2                                            |         |
| More than half the days (8-11 days)                          | 20.3                                     | 14.7                                            | .000    |
| Nearly every day (12-14 days)                                | 14.3                                     | 6.8                                             |         |
| GAD-2 Mean Score (SD)                                        | 2.69 (1.98)                              | 2.18 (1.73)                                     | .000    |
| Probable Case of Anxiety [GAD-2]:                            | 48.1%                                    | 37.9%                                           | .005    |

# Mental Health Status of Medical Students During the COVID-19 Pandemic

## Final Study Results

### Burnout

|                                                                                                          |                   | Know someone<br>who has died of<br>COVID | Do not know<br>someone who has<br>died of COVID | p value |
|----------------------------------------------------------------------------------------------------------|-------------------|------------------------------------------|-------------------------------------------------|---------|
| Degree of agreement with each of the statements on scale<br>of 1 (totally disagree) to 7 (totally agree) |                   |                                          |                                                 |         |
| I think the dedication I invest in my studies is more than what I should for my health                   | Mean (SD)         | 4.50 (1.70)                              | 4.09 (1.82)                                     | .003    |
|                                                                                                          | Percent Agreement | 53.2%                                    | 46.3%                                           | .000    |
| I neglect my personal life when I pursue important achievements in my studies                            | Mean (SD)         | 5.16 (1.65)                              | 4.99 (1.71)                                     | .182    |
|                                                                                                          | Percent Agreement | 74.9%                                    | 71.6%                                           | .442    |
| I risk my health when I pursue good results in my studies                                                | Mean (SD)         | 4.77 (1.76)                              | 4.32 (1.82)                                     | .001    |
|                                                                                                          | Percent Agreement | 64.1%                                    | 54.9%                                           | .001    |
| I overlook my own needs to fulfill academic demands                                                      | Mean (SD)         | 5.40 (1.50)                              | 4.83 (1.83)                                     | .000    |
|                                                                                                          | Percent Agreement | 82.3%                                    | 68.1%                                           | .002    |
| I would like to be pursuing a different career that is more challenging for my abilities                 | Mean (SD)         | 1.78 (1.24)                              | 1.65 (1.14)                                     | .134    |
|                                                                                                          | Percent Agreement | 3.5%                                     | 2.1%                                            | .158    |
| I feel that my studies are an obstacle to the development of my abilities                                | Mean (SD)         | 3.14 (1.77)                              | 2.99 (1.71)                                     | .270    |
|                                                                                                          | Percent Agreement | 22.9%                                    | 20.9%                                           | .700    |
| I would like to be pursuing a different career where I can better develop my talents                     | Mean (SD)         | 2.07 (1.52)                              | 1.93 (1.38)                                     | .194    |
|                                                                                                          | Percent Agreement | 9.1%                                     | 6.2%                                            | .830    |
| My studies don't offer me opportunities to develop my abilities                                          | Mean (SD)         | 2.65 (1.67)                              | 2.58 (1.65)                                     | .580    |
|                                                                                                          | Percent Agreement | 15.6%                                    | 15.9%                                           | .334    |
| When things in school don't turn out as well as they should, I stop trying                               | Mean (SD)         | 2.16 (1.41)                              | 2.10 (1.41)                                     | .544    |
|                                                                                                          | Percent Agreement | 9.5%                                     | 8.7%                                            | .660    |
| I give up in response to difficulties in school                                                          | Mean (SD)         | 1.89 (1.21)                              | 1.82 (1.20)                                     | .451    |
|                                                                                                          | Percent Agreement | 6.5%                                     | 4.5%                                            | .198    |
| I give up in the face of any difficulties in my academic tasks                                           | Mean (SD)         | 1.84 (1.20)                              | 1.72 (1.15)                                     | .180    |
|                                                                                                          | Percent Agreement | 5.2%                                     | 4.1%                                            | .394    |
| When the effort I invest in school is not enough, I give up                                              | Mean (SD)         | 2.02 (1.32)                              | 1.86 (1.24)                                     | .102    |
|                                                                                                          | Percent Agreement | 8.2%                                     | 5.9%                                            | .218    |
| <u>Overload Dimension:</u>                                                                               |                   |                                          |                                                 |         |
|                                                                                                          | Mean Score (SD)   | 13.86 (3.76)                             | 12.67 (4.12)                                    | .000    |
|                                                                                                          | Percent Agreement | 21.2%                                    | 14.2%                                           | .011    |
| <u>Lack of Development Dimension:</u>                                                                    |                   |                                          |                                                 |         |
|                                                                                                          | Mean Score (SD)   | 11.44 (3.82)                             | 10.95 (3.64)                                    | .079    |
|                                                                                                          | Percent Agreement | 8.2%                                     | 5.9%                                            | .212    |
| <u>Neglect Dimension:</u>                                                                                |                   |                                          |                                                 |         |
|                                                                                                          | Mean Score (SD)   | 12.09 (4.50)                             | 11.27 (4.33)                                    | .014    |
|                                                                                                          | Percent Agreement | 17.3%                                    | 10.3%                                           | .004    |

# Mental Health Status of Medical Students During the COVID-19 Pandemic

## Final Study Results

### **Suicidal ideation**

|                                                                           | Know someone<br>who has died of<br>COVID | Do not know<br>someone who has<br>died of COVID | p value |
|---------------------------------------------------------------------------|------------------------------------------|-------------------------------------------------|---------|
| Since March 2020, seriously considered harming self<br>and/or taking life | 11.4%                                    | 5.9%                                            | .006    |

### **Substance Use**

|                                                                                                                                | Know someone<br>who has died of<br>COVID | Do not know<br>someone who has<br>died of COVID | p value |
|--------------------------------------------------------------------------------------------------------------------------------|------------------------------------------|-------------------------------------------------|---------|
| Started or increased substance use (alcohol, marijuana, or<br>other drugs) to cope with pandemic-related stress or<br>emotions | 26.2%                                    | 16.7%                                           | .001    |



# Mental Health Status of Medical Students During the COVID-19 Pandemic

## Final Study Results

### Demographics

|                                              |             |
|----------------------------------------------|-------------|
| Had contact with patients with COVID         | 327 (34.1%) |
| Has not had contact with patients with COVID | 633 (65.9%) |

### Depression/anxiety

|                                                       | Had contact with<br>patients with<br>COVID | Has not had contact<br>with patients with<br>COVID | p value     |      |
|-------------------------------------------------------|--------------------------------------------|----------------------------------------------------|-------------|------|
| Over the last 2 weeks, how often has been bothered by |                                            |                                                    |             |      |
| Little interest or pleasure in doing things           |                                            |                                                    |             |      |
| Not at all (0 days)                                   | 37.3%                                      | 38.7%                                              |             |      |
| Several days (1-7 days)                               | 42.2                                       | 43.1                                               |             |      |
| More than half the days (8-11 days)                   | 15.3                                       | 13.3                                               | .844        |      |
| Nearly every day (12-14 days)                         | 5.2                                        | 4.9                                                |             |      |
| Feeling down, depressed, or hopeless                  |                                            |                                                    |             |      |
| Not at all (0 days)                                   | 36.4%                                      | 41.4%                                              |             |      |
| Several days (1-7 days)                               | 41.0                                       | 39.7                                               |             |      |
| More than half the days (8-11 days)                   | 15.0                                       | 14.5                                               | .137        |      |
| Nearly every day (12-14 days)                         | 7.6                                        | 4.5                                                |             |      |
|                                                       | PHQ-2 Mean Score (SD)                      | 1.82 (1.63)                                        | 1.66 (1.55) | .139 |
|                                                       | Probable Case of Depression [PHQ-2]:       | 27.8%                                              | 23.7%       | .162 |
| Feeling nervous, anxious, or on edge                  |                                            |                                                    |             |      |
| Not at all (0 days)                                   | 20.2%                                      | 20.1%                                              |             |      |
| Several days (1-7 days)                               | 36.1                                       | 39.3                                               |             |      |
| More than half the days (8-11 days)                   | 26.3                                       | 25.9                                               | .649        |      |
| Nearly every day (12-14 days)                         | 17.4                                       | 14.7                                               |             |      |
| Not being able to stop or control worrying            |                                            |                                                    |             |      |
| Not at all (0 days)                                   | 39.4%                                      | 40.4%                                              |             |      |
| Several days (1-7 days)                               | 34.6                                       | 35.5                                               |             |      |
| More than half the days (8-11 days)                   | 16.5                                       | 15.8                                               | .901        |      |
| Nearly every day (12-14 days)                         | 9.5                                        | 8.2                                                |             |      |
|                                                       | GAD-2 Mean Score (SD)                      | 2.37 (1.84)                                        | 2.27 (1.79) | .417 |
|                                                       | Probable Case of Anxiety [GAD-2]:          | 42.5%                                              | 39.3%       | .343 |

# Mental Health Status of Medical Students During the COVID-19 Pandemic

## Final Study Results

### Burnout

|                                                                                                       | Had contact with patients with COVID | Has not had contact with patients with COVID | p value |
|-------------------------------------------------------------------------------------------------------|--------------------------------------|----------------------------------------------|---------|
| Degree of agreement with each of the statements on scale of 1 (totally disagree) to 7 (totally agree) |                                      |                                              |         |
| I think the dedication I invest in my studies is more than what I should for my health                |                                      |                                              |         |
| Mean (SD)                                                                                             | 4.21 (1.76)                          | 4.18 (1.83)                                  | .822    |
| Percent Agreement                                                                                     | 44.4%                                | 49.9%                                        | .059    |
| I neglect my personal life when I pursue important achievements in my studies                         |                                      |                                              |         |
| Mean (SD)                                                                                             | 5.13 (1.72)                          | 4.99 (1.68)                                  | .212    |
| Percent Agreement                                                                                     | 72.2%                                | 72.6%                                        | .158    |
| I risk my health when I pursue good results in my studies                                             |                                      |                                              |         |
| Mean (SD)                                                                                             | 4.70 (1.77)                          | 4.29 (1.82)                                  | .001    |
| Percent Agreement                                                                                     | 62.5%                                | 54.4%                                        | .052    |
| I overlook my own needs to fulfill academic demands                                                   |                                      |                                              |         |
| Mean (SD)                                                                                             | 5.19 (1.69)                          | 4.85 (1.80)                                  | .005    |
| Percent Agreement                                                                                     | 75.6%                                | 69.5%                                        | .137    |
| I would like to be pursuing a different career that is more challenging for my abilities              |                                      |                                              |         |
| Mean (SD)                                                                                             | 1.86 (1.33)                          | 1.60 (1.05)                                  | .002    |
| Percent Agreement                                                                                     | 4.1%                                 | 1.6%                                         | .056    |
| I feel that my studies are an obstacle to the development of my abilities                             |                                      |                                              |         |
| Mean (SD)                                                                                             | 3.19 (1.80)                          | 2.95 (1.68)                                  | .036    |
| Percent Agreement                                                                                     | 25.9%                                | 19.1%                                        | .189    |
| I would like to be pursuing a different career where I can better develop my talents                  |                                      |                                              |         |
| Mean (SD)                                                                                             | 2.10 (1.51)                          | 1.89 (1.36)                                  | .036    |
| Percent Agreement                                                                                     | 8.8%                                 | 5.9%                                         | .119    |
| My studies don't offer me opportunities to develop my abilities                                       |                                      |                                              |         |
| Mean (SD)                                                                                             | 2.66 (1.64)                          | 2.57 (1.67)                                  | .416    |
| Percent Agreement                                                                                     | 15.6%                                | 15.9%                                        | .745    |
| When things in school don't turn out as well as they should, I stop trying                            |                                      |                                              |         |
| Mean (SD)                                                                                             | 2.13 (1.45)                          | 2.11 (1.39)                                  | .845    |
| Percent Agreement                                                                                     | 8.8%                                 | 9.0%                                         | .474    |
| I give up in response to difficulties in school                                                       |                                      |                                              |         |
| Mean (SD)                                                                                             | 1.85 (1.21)                          | 1.84 (1.20)                                  | .898    |
| Percent Agreement                                                                                     | 5.0%                                 | 5.0%                                         | .170    |
| I give up in the face of any difficulties in my academic tasks                                        |                                      |                                              |         |
| Mean (SD)                                                                                             | 1.78 (1.20)                          | 1.74 (1.14)                                  | .647    |
| Percent Agreement                                                                                     | 4.7%                                 | 4.2%                                         | .301    |
| When the effort I invest in school is not enough, I give up                                           |                                      |                                              |         |
| Mean (SD)                                                                                             | 1.91 (1.26)                          | 1.90 (1.27)                                  | .903    |
| Percent Agreement                                                                                     | 6.3%                                 | 6.6%                                         | .202    |
| <u>Overload Dimension:</u>                                                                            |                                      |                                              |         |
| Mean Score (SD)                                                                                       | 13.35 (3.92)                         | 12.77 (4.13)                                 | .036    |
| Percent Agreement                                                                                     | 18.8%                                | 14.4%                                        | .087    |
| <u>Lack of Development Dimension:</u>                                                                 |                                      |                                              |         |
| Mean Score (SD)                                                                                       | 11.43 (3.69)                         | 10.89 (3.67)                                 | .034    |
| Percent Agreement                                                                                     | 8.8%                                 | 5.3%                                         | .041    |
| <u>Neglect Dimension:</u>                                                                             |                                      |                                              |         |
| Mean Score (SD)                                                                                       | 11.93 (4.50)                         | 11.24 (4.31)                                 | .022    |
| Percent Agreement                                                                                     | 13.1%                                | 11.4%                                        | .439    |

# Mental Health Status of Medical Students During the COVID-19 Pandemic

## Final Study Results

### **Suicidal ideation**

|                                                                        | Had contact with patients with COVID | Has not had contact with patients with COVID | p value |
|------------------------------------------------------------------------|--------------------------------------|----------------------------------------------|---------|
| Since March 2020, seriously considered harming self and/or taking life | 10.0%                                | 5.8%                                         | .018    |

### **Substance Use**

|                                                                                                                          | Had contact with patients with COVID | Has not had contact with patients with COVID | p value |
|--------------------------------------------------------------------------------------------------------------------------|--------------------------------------|----------------------------------------------|---------|
| Started or increased substance use (alcohol, marijuana, or other drugs) to cope with pandemic-related stress or emotions | 21.9%                                | 17.6%                                        | .109    |

# Mental Health Status of Medical Students During the COVID-19 Pandemic Final Study Results

## Demographics

Level of worry about contracting COVID:

|                  |             |
|------------------|-------------|
| Not worried      | 191 (19.9%) |
| Somewhat worried | 436 (45.4%) |
| Very worried     | 333 (34.7%) |

## Depression/anxiety

|                                                          | Not Worried | Somewhat Worried | Very Worried | p value |
|----------------------------------------------------------|-------------|------------------|--------------|---------|
| Over the last 2 weeks, how often has been bothered by    |             |                  |              |         |
| Little interest or pleasure in doing things <sup>1</sup> |             |                  |              |         |
| Not at all (0 days)                                      | 49.7%       | 39.0%            | 30.6%        | .000    |
| Several days (1-7 days)                                  | 34.6        | 44.3             | 45.6         |         |
| More than half the days (8-11 days)                      | 8.4         | 12.6             | 18.9         |         |
| Nearly every day (12-14 days)                            | 7.3         | 4.1              | 4.8          |         |
| Feeling down, depressed, or hopeless <sup>1</sup>        |             |                  |              |         |
| Not at all (0 days)                                      | 51.3%       | 40.6%            | 31.8%        | .000    |
| Several days (1-7 days)                                  | 30.9        | 41.7             | 43.2         |         |
| More than half the days (8-11 days)                      | 9.4         | 12.8             | 20.1         |         |
| Nearly every day (12-14 days)                            | 8.4         | 4.8              | 4.8          |         |
| PHQ-2 Mean Score (SD) <sup>1</sup>                       | 1.48 (1.74) | 1.64 (1.52)      | 1.96 (1.53)  | .001    |
| Probable Case of Depression [PHQ-2]: <sup>1</sup>        | 19.9%       | 22.7%            | 31.2%        | .005    |
| Feeling nervous, anxious, or on edge <sup>1</sup>        |             |                  |              |         |
| Not at all (0 days)                                      | 36.6%       | 22.0%            | 8.1%         | .000    |
| Several days (1-7 days)                                  | 32.5        | 38.3             | 41.4         |         |
| More than half the days (8-11 days)                      | 17.8        | 26.1             | 30.6         |         |
| Nearly every day (12-14 days)                            | 13.1        | 13.5             | 19.8         |         |
| Not being able to stop or control worrying <sup>1</sup>  |             |                  |              |         |
| Not at all (0 days)                                      | 51.8%       | 42.9%            | 29.7%        | .000    |
| Several days (1-7 days)                                  | 30.9        | 35.1             | 37.8         |         |
| More than half the days (8-11 days)                      | 10.5        | 14.2             | 21.6         |         |
| Nearly every day (12-14 days)                            | 6.8         | 7.8              | 10.8         |         |
| GAD-2 Mean Score (SD) <sup>1,2</sup>                     | 1.80 (1.81) | 2.18 (1.78)      | 2.76 (1.72)  | .000    |
| Probable Case of Anxiety [GAD-2]: <sup>1</sup>           | 29.3%       | 37.2%            | 51.1%        | .000    |

(1) Statistical differences are between Not Worried and Very Worried groups.

(2) Statistical differences are between Somewhat Worried and Very Worried groups.

# Mental Health Status of Medical Students During the COVID-19 Pandemic

## Final Study Results

### Burnout

|                                                                                                       |                   | Not Worried  | Somewhat Worried | Very Worried | p value |
|-------------------------------------------------------------------------------------------------------|-------------------|--------------|------------------|--------------|---------|
| Degree of agreement with each of the statements on scale of 1 (totally disagree) to 7 (totally agree) |                   |              |                  |              |         |
| I think the dedication I invest in my studies is more than what I should for my health <sup>1</sup>   | Mean (SD)         | 3.79 (1.89)  | 4.16 (1.73)      | 4.47 (1.80)  | .000    |
|                                                                                                       | Percent Agreement | 37.8%        | 46.8%            | 55.5%        | .001    |
| I neglect my personal life when I pursue important achievements in my studies <sup>1</sup>            | Mean (SD)         | 4.63 (1.88)  | 4.95 (1.70)      | 5.38 (1.52)  | .000    |
|                                                                                                       | Percent Agreement | 62.2%        | 69.7%            | 81.9%        | .000    |
| I risk my health when I pursue good results in my studies <sup>1</sup>                                | Mean (SD)         | 3.97 (1.92)  | 4.33 (1.79)      | 4.81 (1.72)  | .000    |
|                                                                                                       | Percent Agreement | 44.3%        | 55.1%            | 67.2%        | .000    |
| I overlook my own needs to fulfill academic demands <sup>1</sup>                                      | Mean (SD)         | 4.54 (1.95)  | 4.88 (1.76)      | 5.33 (1.60)  | .000    |
|                                                                                                       | Percent Agreement | 61.6%        | 69.7%            | 79.8%        | .000    |
| I would like to be pursuing a different career that is more challenging for my abilities              | Mean (SD)         | 1.67 (1.16)  | 1.70 (1.22)      | 1.67 (1.08)  | .952    |
|                                                                                                       | Percent Agreement | 1.6%         | 3.7%             | 1.2%         | .111    |
| I feel that my studies are an obstacle to the development of my abilities                             | Mean (SD)         | 3.12 (1.76)  | 2.99 (1.70)      | 3.03 (1.74)  | .679    |
|                                                                                                       | Percent Agreement | 25.4%        | 19.4%            | 21.8%        | .105    |
| I would like to be pursuing a different career where I can better develop my talents                  | Mean (SD)         | 1.99 (1.43)  | 1.94 (1.38)      | 1.98 (1.46)  | .907    |
|                                                                                                       | Percent Agreement | 6.5%         | 7.2%             | 6.7%         | .200    |
| My studies don't offer me opportunities to develop my abilities                                       | Mean (SD)         | 2.51 (1.66)  | 2.52 (1.60)      | 2.76 (1.71)  | .090    |
|                                                                                                       | Percent Agreement | 14.1%        | 13.7%            | 19.6%        | .530    |
| When things in school don't turn out as well as they should, I stop trying                            | Mean (SD)         | 2.02 (1.36)  | 2.14 (1.42)      | 2.13 (1.42)  | .563    |
|                                                                                                       | Percent Agreement | 7.6%         | 8.8%             | 9.8%         | .525    |
| I give up in response to difficulties in school                                                       | Mean (SD)         | 1.74 (1.16)  | 1.87 (1.19)      | 1.86 (1.26)  | .415    |
|                                                                                                       | Percent Agreement | 3.8%         | 5.3%             | 5.2%         | .368    |
| I give up in the face of any difficulties in my academic tasks                                        | Mean (SD)         | 1.66 (1.13)  | 1.76 (1.14)      | 1.79 (1.21)  | .503    |
|                                                                                                       | Percent Agreement | 3.2%         | 4.4%             | 4.9%         | .241    |
| When the effort I invest in school is not enough, I give up                                           | Mean (SD)         | 1.77 (1.18)  | 1.92 (1.25)      | 1.94 (1.33)  | .305    |
|                                                                                                       | Percent Agreement | 4.3%         | 6.7%             | 7.4%         | .326    |
| <u>Overload Dimension:</u> <sup>1</sup>                                                               |                   |              |                  |              |         |
|                                                                                                       | Mean Score (SD)   | 12.05 (4.32) | 12.84 (4.06)     | 13.64 (3.83) | .000    |
|                                                                                                       | Percent Agreement | 9.7%         | 16.7%            | 18.4%        | .030    |
| <u>Lack of Development Dimension:</u> <sup>1</sup>                                                    |                   |              |                  |              |         |
|                                                                                                       | Mean Score (SD)   | 10.47 (3.82) | 10.93 (3.65)     | 11.60 (3.60) | .002    |
|                                                                                                       | Percent Agreement | 4.9%         | 5.6%             | 8.6%         | .149    |
| <u>Neglect Dimension:</u>                                                                             |                   |              |                  |              |         |
|                                                                                                       | Mean Score (SD)   | 10.89 (4.37) | 11.38 (4.43)     | 11.92 (4.31) | .032    |
|                                                                                                       | Percent Agreement | 10.3%        | 12.0%            | 12.9%        | .682    |

(1) Statistical differences are between Not Worried and Very Worried groups.

(2) Statistical differences are between Somewhat Worried and Very Worried groups.

# Mental Health Status of Medical Students During the COVID-19 Pandemic

## Final Study Results

### **Suicidal ideation**

|                                                                           | Not<br>Worried | Somewhat<br>Worried | Very<br>Worried | p value |
|---------------------------------------------------------------------------|----------------|---------------------|-----------------|---------|
| Since March 2020, seriously considered harming self<br>and/or taking life | 9.7%           | 7.2%                | 5.9%            | .269    |

### **Substance Use**

|                                                                                                                                | Not<br>Worried | Somewhat<br>Worried | Very<br>Worried | p value |
|--------------------------------------------------------------------------------------------------------------------------------|----------------|---------------------|-----------------|---------|
| Started or increased substance use (alcohol, marijuana, or<br>other drugs) to cope with pandemic-related stress or<br>emotions | 17.8%          | 20.4%               | 17.9%           | .624    |

# Mental Health Status of Medical Students During the COVID-19 Pandemic Final Study Results

## Demographics

Area in which you spent the majority of your time since March 2020?

|       |             |
|-------|-------------|
| Rural | 160 (18.9%) |
| Urban | 685 (81.1%) |

## Depression/anxiety

|                                                       | Rural                                | Urban       | p value     |      |
|-------------------------------------------------------|--------------------------------------|-------------|-------------|------|
| Over the last 2 weeks, how often has been bothered by |                                      |             |             |      |
| Little interest or pleasure in doing things           |                                      |             |             |      |
| Not at all (0 days)                                   | 41.9%                                | 38.4%       | .093        |      |
| Several days (1-7 days)                               | 46.2                                 | 41.3        |             |      |
| More than half the days (8-11 days)                   | 9.4                                  | 14.5        |             |      |
| Nearly every day (12-14 days)                         | 2.5                                  | 5.8         |             |      |
| Feeling down, depressed, or hopeless                  |                                      |             |             |      |
| Not at all (0 days)                                   | 46.9%                                | 39.0%       | .306        |      |
| Several days (1-7 days)                               | 35.0                                 | 39.9        |             |      |
| More than half the days (8-11 days)                   | 13.7                                 | 15.0        |             |      |
| Nearly every day (12-14 days)                         | 4.4                                  | 6.1         |             |      |
|                                                       | PHQ-2 Mean Score (SD)                | 1.48 (1.50) | 1.76 (1.62) | .047 |
|                                                       | Probable Case of Depression [PHQ-2]: | 18.1%       | 26.4%       | .029 |
| Feeling nervous, anxious, or on edge                  |                                      |             |             |      |
| Not at all (0 days)                                   | 25.0%                                | 19.9%       | .499        |      |
| Several days (1-7 days)                               | 37.5                                 | 38.4        |             |      |
| More than half the days (8-11 days)                   | 23.8                                 | 25.4        |             |      |
| Nearly every day (12-14 days)                         | 13.7                                 | 16.3        |             |      |
| Not being able to stop or control worrying            |                                      |             |             |      |
| Not at all (0 days)                                   | 44.4%                                | 40.4%       | .456        |      |
| Several days (1-7 days)                               | 35.6                                 | 33.7        |             |      |
| More than half the days (8-11 days)                   | 11.9                                 | 16.5        |             |      |
| Nearly every day (12-14 days)                         | 8.1                                  | 9.4         |             |      |
|                                                       | GAD-2 Mean Score (SD)                | 2.10 (1.81) | 2.33 (1.83) | .152 |
|                                                       | Probable Case of Anxiety [GAD-2]:    | 35.0%       | 40.4%       | .205 |

# Mental Health Status of Medical Students During the COVID-19 Pandemic

## Final Study Results

### Burnout

|                                                                                                       | Rural        | Urban        | p value |
|-------------------------------------------------------------------------------------------------------|--------------|--------------|---------|
| Degree of agreement with each of the statements on scale of 1 (totally disagree) to 7 (totally agree) |              |              |         |
| I think the dedication I invest in my studies is more than what I should for my health                |              |              |         |
| Mean (SD)                                                                                             | 4.13 (1.73)  | 4.16 (1.85)  | .872    |
| Percent Agreement                                                                                     | 46.5%        | 48.7%        | .530    |
| I neglect my personal life when I pursue important achievements in my studies                         |              |              |         |
| Mean (SD)                                                                                             | 4.97 (1.70)  | 5.02 (1.72)  | .714    |
| Percent Agreement                                                                                     | 69.0%        | 72.8%        | .846    |
| I risk my health when I pursue good results in my studies                                             |              |              |         |
| Mean (SD)                                                                                             | 4.23 (1.86)  | 4.43 (1.81)  | .214    |
| Percent Agreement                                                                                     | 49.0%        | 58.0%        | .041    |
| I overlook my own needs to fulfill academic demands                                                   |              |              |         |
| Mean (SD)                                                                                             | 4.83 (1.78)  | 4.97 (1.79)  | .374    |
| Percent Agreement                                                                                     | 68.4%        | 71.6%        | .012    |
| I would like to be pursuing a different career that is more challenging for my abilities              |              |              |         |
| Mean (SD)                                                                                             | 1.67 (1.27)  | 1.68 (1.10)  | .960    |
| Percent Agreement                                                                                     | 3.9%         | 1.6%         | .330    |
| I feel that my studies are an obstacle to the development of my abilities                             |              |              |         |
| Mean (SD)                                                                                             | 2.79 (1.72)  | 3.04 (1.74)  | .109    |
| Percent Agreement                                                                                     | 19.4%        | 22.0%        | .287    |
| I would like to be pursuing a different career where I can better develop my talents                  |              |              |         |
| Mean (SD)                                                                                             | 1.76 (1.42)  | 1.99 (1.43)  | .338    |
| Percent Agreement                                                                                     | 5.8%         | 7.0%         | .321    |
| My studies don't offer me opportunities to develop my abilities                                       |              |              |         |
| Mean (SD)                                                                                             | 2.30 (1.58)  | 2.62 (1.67)  | .032    |
| Percent Agreement                                                                                     | 11.6%        | 16.3%        | .097    |
| When things in school don't turn out as well as they should, I stop trying                            |              |              |         |
| Mean (SD)                                                                                             | 2.00 (1.33)  | 2.16 (1.42)  | .199    |
| Percent Agreement                                                                                     | 6.5%         | 9.6%         | .004    |
| I give up in response to difficulties in school                                                       |              |              |         |
| Mean (SD)                                                                                             | 1.75 (1.13)  | 1.86 (1.22)  | .298    |
| Percent Agreement                                                                                     | 3.2%         | 5.5%         | .261    |
| I give up in the face of any difficulties in my academic tasks                                        |              |              |         |
| Mean (SD)                                                                                             | 1.57 (0.95)  | 1.79 (1.20)  | .014    |
| Percent Agreement                                                                                     | 1.9%         | 4.9%         | .469    |
| When the effort I invest in school is not enough, I give up                                           |              |              |         |
| Mean (SD)                                                                                             | 1.73 (1.12)  | 1.93 (1.29)  | .068    |
| Percent Agreement                                                                                     | 5.2%         | 6.8%         | .366    |
| <u>Overload Dimension:</u>                                                                            |              |              |         |
| Mean Score (SD)                                                                                       | 12.57 (3.98) | 12.97 (4.16) | .276    |
| Percent Agreement                                                                                     | 9.7%         | 17.3%        | .019    |
| <u>Lack of Development Dimension:</u>                                                                 |              |              |         |
| Mean Score (SD)                                                                                       | 10.51 (3.41) | 11.11 (3.80) | .072    |
| Percent Agreement                                                                                     | 4.5%         | 7.0%         | .267    |
| <u>Neglect Dimension:</u>                                                                             |              |              |         |
| Mean Score (SD)                                                                                       | 10.75 (4.20) | 11.56 (4.45) | .038    |
| Percent Agreement                                                                                     | 7.7%         | 12.6%        | .091    |



# Mental Health Status of Medical Students During the COVID-19 Pandemic

## Final Study Results

### **Suicidal ideation**

|                                                                        | Rural | Urban | p value |
|------------------------------------------------------------------------|-------|-------|---------|
| Since March 2020, seriously considered harming self and/or taking life | 5.2%  | 7.7%  | .269    |

### **Substance Use**

|                                                                                                                          | Rural | Urban | p value |
|--------------------------------------------------------------------------------------------------------------------------|-------|-------|---------|
| Started or increased substance use (alcohol, marijuana, or other drugs) to cope with pandemic-related stress or emotions | 16.1% | 19.7% | .303    |

# Mental Health Status of Medical Students During the COVID-19 Pandemic Burnout Results

Number of valid responses: 960

## Overall

Students who met the criteria for burnout in any dimension

|     |             |
|-----|-------------|
| Yes | 201 (21.3%) |
| No  | 742 (78.7%) |

## Students who met the criteria for burnout in any dimension by Independent Variables

|                                               | Yes         | No          | $\rho$ value |
|-----------------------------------------------|-------------|-------------|--------------|
| Curriculum Year:                              |             |             | .120         |
| Didactic Year Respondents                     | 118 (19.8%) | 479 (80.2%) |              |
| Clinical Year Respondents                     | 81 (24.1%)  | 255 (75.9%) |              |
| Gender Identification:                        |             |             | .926         |
| Male Respondents                              | 77 (20.8%)  | 293 (79.2%) |              |
| Female Respondents                            | 119 (21.1%) | 446 (78.9%) |              |
| Ethnicity:                                    |             |             | .056         |
| White Respondents                             | 114 (19.2%) | 480 (80.8%) |              |
| Non-White Respondents                         | 78 (24.6%)  | 239 (75.4%) |              |
| Spent the majority of time since March 2020:  |             |             | .029         |
| Rural                                         | 23 (14.8%)  | 132 (85.2%) |              |
| Urban                                         | 154 (22.8%) | 522 (77.2%) |              |
| Didactic year type of curriculum utilized:    |             |             | .028         |
| In person                                     | 0 ( 0.0%)   | 6 (100%)    |              |
| Virtual                                       | 40 (26.7%)  | 110 (73.3%) |              |
| Combination                                   | 78 (17.7%)  | 363 (82.3%) |              |
| COVID Groups:                                 |             |             |              |
| COVID diagnosis Respondents                   | 20 (25.0%)  | 60 (75.0%)  | .400         |
| No COVID diagnosis Respondents                | 181 (21.0%) | 682 (79.0%) |              |
| Loved one diagnosed with COVID                | 113 (19.8%) | 457 (80.2%) | .167         |
| No loved one diagnosed with COVID             | 88 (23.6%)  | 285 (76.4%) |              |
| Know someone who has died of COVID            | 65 (28.1%)  | 166 (71.9%) | .004         |
| Do not know someone who has died of COVID     | 136 (19.1%) | 576 (80.9%) |              |
| Had contact with patients with COVID          | 77 (24.1%)  | 243 (75.9%) | .140         |
| Has not had contact with patients with COVID  | 124 (19.9%) | 499 (80.1%) |              |
| Level of worry about contracting COVID-19     |             |             | .059         |
| Not worried at all                            | 28 (15.1%)  | 157 (84.9%) |              |
| Somewhat worried                              | 95 (22.0%)  | 337 (78.0%) |              |
| Very worried                                  | 78 (23.9%)  | 248 (76.1%) |              |
| Use of mental health resources:               |             |             | .000         |
| Has accessed mental health care Respondents   | 133 (27.1%) | 357 (72.9%) |              |
| Never accessed mental health care Respondents | 66 (14.6%)  | 385 (85.4%) |              |

# Mental Health Status of Medical Students During the COVID-19 Pandemic Curriculum Variable Results

## Demographics

If you are currently in didactic years, what type of curriculum is your school utilizing?

|             |             |
|-------------|-------------|
| In person   | 6 ( 1.0%)   |
| Virtual     | 151 (25.0%) |
| Combination | 448 (74.0%) |

## Depression/anxiety

|                                                       | In person                            | Virtual     | Combination | p value     |      |
|-------------------------------------------------------|--------------------------------------|-------------|-------------|-------------|------|
| Over the last 2 weeks, how often has been bothered by |                                      |             |             |             |      |
| Little interest or pleasure in doing things           |                                      |             |             |             |      |
| Not at all (0 days)                                   | 83.3%                                | 29.1%       | 38.8%       | .083        |      |
| Several days (1-7 days)                               | 16.7                                 | 51.7        | 42.0        |             |      |
| More than half the days (8-11 days)                   | 0.0                                  | 14.6        | 13.8        |             |      |
| Nearly every day (12-14 days)                         | 0.0                                  | 4.6         | 5.4         |             |      |
| Feeling down, depressed, or hopeless                  |                                      |             |             |             |      |
| Not at all (0 days)                                   | 83.3%                                | 33.1%       | 40.8%       | .106        |      |
| Several days (1-7 days)                               | 16.7                                 | 43.7        | 40.0        |             |      |
| More than half the days (8-11 days)                   | 0.0                                  | 19.2        | 13.4        |             |      |
| Nearly every day (12-14 days)                         | 0.0                                  | 4.0         | 5.8         |             |      |
|                                                       | PHQ-2 Mean Score (SD) <sup>1</sup>   | 0.33 (0.82) | 1.89 (1.45) | 1.70 (1.59) | .038 |
|                                                       | Probable Case of Depression [PHQ-2]: | 0.0%        | 24.5%       | 25.2%       | .363 |
| Feeling nervous, anxious, or on edge                  |                                      |             |             |             |      |
| Not at all (0 days)                                   | 16.7%                                | 14.5%       | 19.2%       | .164        |      |
| Several days (1-7 days)                               | 83.3                                 | 44.4        | 37.7        |             |      |
| More than half the days (8-11 days)                   | 0.0                                  | 28.5        | 26.8        |             |      |
| Nearly every day (12-14 days)                         | 0.0                                  | 12.6        | 16.3        |             |      |
| Not being able to stop or control worrying            |                                      |             |             |             |      |
| Not at all (0 days)                                   | 83.3%                                | 35.1%       | 39.7%       | .199        |      |
| Several days (1-7 days)                               | 16.7                                 | 42.4        | 34.4        |             |      |
| More than half the days (8-11 days)                   | 0.0                                  | 13.9        | 17.2        |             |      |
| Nearly every day (12-14 days)                         | 0.0                                  | 8.6         | 8.7         |             |      |
|                                                       | GAD-2 Mean Score (SD)                | 1.00 (0.63) | 2.35 (1.68) | 2.35 (1.82) | .181 |
|                                                       | Probable Case of Anxiety [GAD-2]:    | 0.0%        | 39.1%       | 42.0%       | .102 |

(1) Statistical differences are between In Person and Virtual groups.

# Mental Health Status of Medical Students During the COVID-19 Pandemic

## Curriculum Variable Results

### Burnout

|                                                                                                       | In person   | Virtual      | Combination  | p value |
|-------------------------------------------------------------------------------------------------------|-------------|--------------|--------------|---------|
| Degree of agreement with each of the statements on scale of 1 (totally disagree) to 7 (totally agree) |             |              |              |         |
| I think the dedication I invest in my studies is more than what I should for my health <sup>1,2</sup> |             |              |              |         |
| Mean (SD)                                                                                             | 2.17 (0.98) | 4.33 (1.76)  | 4.28 (1.81)  | .015    |
| Percent Agreement                                                                                     | 0.0%        | 54.0%        | 50.8%        | .144    |
| I neglect my personal life when I pursue important achievements in my studies                         |             |              |              |         |
| Mean (SD)                                                                                             | 4.17 (2.14) | 5.07 (1.53)  | 5.10 (1.68)  | .388    |
| Percent Agreement                                                                                     | 50.0%       | 78.0%        | 73.7%        | .108    |
| I risk my health when I pursue good results in my studies                                             |             |              |              |         |
| Mean (SD)                                                                                             | 2.67 (1.37) | 4.46 (1.63)  | 4.38 (1.83)  | .054    |
| Percent Agreement                                                                                     | 16.7%       | 62.7%        | 55.6%        | .102    |
| I overlook my own needs to fulfill academic demands <sup>1,2</sup>                                    |             |              |              |         |
| Mean (SD)                                                                                             | 2.83 (1.72) | 5.07 (1.57)  | 4.94 (1.76)  | .008    |
| Percent Agreement                                                                                     | 16.7%       | 76.7%        | 69.8%        | .009    |
| I would like to be pursuing a different career that is more challenging for my abilities              |             |              |              |         |
| Mean (SD)                                                                                             | 1.00 (0.00) | 1.66 (1.05)  | 1.61 (1.08)  | .322    |
| Percent Agreement                                                                                     | 0.0%        | 2.0%         | 1.6%         | .681    |
| I feel that my studies are an obstacle to the development of my abilities <sup>1</sup>                |             |              |              |         |
| Mean (SD)                                                                                             | 1.67 (0.82) | 3.21 (1.58)  | 2.86 (1.66)  | .013    |
| Percent Agreement                                                                                     | 0.0%        | 22.0%        | 17.5%        | .132    |
| I would like to be pursuing a different career where I can better develop my talents <sup>2</sup>     |             |              |              |         |
| Mean (SD)                                                                                             | 1.00 (0.00) | 2.01 (1.27)  | 1.82 (1.39)  | .098    |
| Percent Agreement                                                                                     | 0.0%        | 4.7%         | 5.9%         | .021    |
| My studies don't offer me opportunities to develop my abilities <sup>3</sup>                          |             |              |              |         |
| Mean (SD)                                                                                             | 1.50 (0.84) | 2.99 (1.69)  | 2.45 (1.64)  | .001    |
| Percent Agreement                                                                                     | 0.0%        | 22.0%        | 14.3%        | .084    |
| When things in school don't turn out as well as they should, I stop trying                            |             |              |              |         |
| Mean (SD)                                                                                             | 1.50 (0.84) | 2.32 (1.46)  | 2.02 (1.38)  | .047    |
| Percent Agreement                                                                                     | 0.0%        | 10.0%        | 8.4%         | .209    |
| I give up in response to difficulties in school <sup>3</sup>                                          |             |              |              |         |
| Mean (SD)                                                                                             | 1.33 (0.82) | 2.05 (1.26)  | 1.78 (1.19)  | .032    |
| Percent Agreement                                                                                     | 0.0%        | 6.7%         | 4.5%         | .176    |
| I give up in the face of any difficulties in my academic tasks                                        |             |              |              |         |
| Mean (SD)                                                                                             | 1.33 (0.82) | 1.93 (1.18)  | 1.68 (1.15)  | .057    |
| Percent Agreement                                                                                     | 0.0%        | 5.3%         | 3.9%         | .099    |
| When the effort I invest in school is not enough, I give up <sup>3</sup>                              |             |              |              |         |
| Mean (SD)                                                                                             | 1.33 (0.82) | 2.20 (1.41)  | 1.80 (1.23)  | .002    |
| Percent Agreement                                                                                     | 0.0%        | 10.0%        | 5.7%         | .126    |
| <u>Overload Dimension:</u> <sup>1,2</sup>                                                             |             |              |              |         |
| Mean Score (SD)                                                                                       | 7.33 (1.97) | 13.46 (3.69) | 12.82 (4.00) | .000    |
| Percent Agreement                                                                                     | 0.0%        | 17.3%        | 12.7%        | .224    |
| <u>Lack of Development Dimension:</u> <sup>1,3</sup>                                                  |             |              |              |         |
| Mean Score (SD)                                                                                       | 8.00 (2.10) | 11.65 (3.49) | 10.84 (3.57) | .006    |
| Percent Agreement                                                                                     | 0.0%        | 4.7%         | 6.3%         | .621    |
| <u>Neglect Dimension:</u> <sup>1,3</sup>                                                              |             |              |              |         |
| Mean Score (SD)                                                                                       | 7.17 (3.31) | 12.19 (4.33) | 11.06 (4.14) | .001    |
| Percent Agreement                                                                                     | 0.0%        | 16.7%        | 9.5%         | .039    |

(1) Statistical differences are between In Person and Virtual groups.

(2) Statistical differences are between In Person and Combination groups.

(3) Statistical differences are between Virtual and Combination groups.

## Mental Health Status of Medical Students During the COVID-19 Pandemic Curriculum Variable Results

### **Suicidal ideation**

|                                                                        | In person | Virtual | Combination | p value |
|------------------------------------------------------------------------|-----------|---------|-------------|---------|
| Since March 2020, seriously considered harming self and/or taking life | 0.0%      | 6.7%    | 7.7%        | .714    |

### **Substance Use**

|                                                                                                                          | In person | Virtual | Combination | p value |
|--------------------------------------------------------------------------------------------------------------------------|-----------|---------|-------------|---------|
| Started or increased substance use (alcohol, marijuana, or other drugs) to cope with pandemic-related stress or emotions | 0.0%      | 20.0%   | 18.2%       | .447    |

# Mental Health Status of Medical Students During the COVID-19 Pandemic

## Final Study Results

### Demographics

Where do you attend medical school?

|                  |             |
|------------------|-------------|
| Allopathic (MD)  | 306 (31.9%) |
| Osteopathic (DO) | 654 (68.1%) |

### Depression/anxiety

|                                                       | Allopathic<br>Respondents | Osteopathic<br>Respondents | p value |
|-------------------------------------------------------|---------------------------|----------------------------|---------|
| Over the last 2 weeks, how often has been bothered by |                           |                            |         |
| Little interest or pleasure in doing things           |                           |                            |         |
| Not at all (0 days)                                   | 37.9%                     | 38.4%                      |         |
| Several days (1-7 days)                               | 44.1                      | 42.2                       |         |
| More than half the days (8-11 days)                   | 13.1                      | 14.4                       | .929    |
| Nearly every day (12-14 days)                         | 4.9                       | 5.0                        |         |
| Feeling down, depressed, or hopeless                  |                           |                            |         |
| Not at all (0 days)                                   | 37.9%                     | 40.5%                      |         |
| Several days (1-7 days)                               | 42.5                      | 39.0                       |         |
| More than half the days (8-11 days)                   | 14.7                      | 14.7                       | .728    |
| Nearly every day (12-14 days)                         | 4.9                       | 5.8                        |         |
| PHQ-2 Mean Score (SD)                                 | 1.72 (1.54)               | 1.72 (1.60)                | .978    |
| Probable Case of Depression [PHQ-2]:                  | 23.9%                     | 25.7%                      | .542    |
| Feeling nervous, anxious, or on edge                  |                           |                            |         |
| Not at all (0 days)                                   | 18.3%                     | 21.0%                      |         |
| Several days (1-7 days)                               | 43.8                      | 35.6                       |         |
| More than half the days (8-11 days)                   | 25.5                      | 26.3                       | .061    |
| Nearly every day (12-14 days)                         | 12.4                      | 17.1                       |         |
| Not being able to stop or control worrying            |                           |                            |         |
| Not at all (0 days)                                   | 43.5%                     | 38.5%                      |         |
| Several days (1-7 days)                               | 36.9                      | 34.4                       |         |
| More than half the days (8-11 days)                   | 13.1                      | 17.4                       | .093    |
| Nearly every day (12-14 days)                         | 6.5                       | 9.7                        |         |
| GAD-2 Mean Score (SD)                                 | 2.15 (1.67)               | 2.38 (1.86)                | .055    |
| Probable Case of Anxiety [GAD-2]:                     | 36.9%                     | 42.0%                      | .132    |

# Mental Health Status of Medical Students During the COVID-19 Pandemic

## Final Study Results

### Burnout

|                                                                                                       | Allopathic Respondents | Osteopathic Respondents | p value |
|-------------------------------------------------------------------------------------------------------|------------------------|-------------------------|---------|
| Degree of agreement with each of the statements on scale of 1 (totally disagree) to 7 (totally agree) |                        |                         |         |
| I think the dedication I invest in my studies is more than what I should for my health                |                        |                         |         |
| Mean (SD)                                                                                             | 4.24 (1.79)            | 4.17 (1.81)             | .562    |
| Percent Agreement                                                                                     | 53.6%                  | 45.4%                   | .016    |
| I neglect my personal life when I pursue important achievements in my studies                         |                        |                         |         |
| Mean (SD)                                                                                             | 4.99 (1.64)            | 5.06 (1.73)             | .576    |
| Percent Agreement                                                                                     | 74.3%                  | 71.5%                   | .009    |
| I risk my health when I pursue good results in my studies                                             |                        |                         |         |
| Mean (SD)                                                                                             | 4.37 (1.70)            | 4.45 (1.87)             | .502    |
| Percent Agreement                                                                                     | 58.2%                  | 56.7%                   | .020    |
| I overlook my own needs to fulfill academic demands                                                   |                        |                         |         |
| Mean (SD)                                                                                             | 4.86 (1.72)            | 5.02 (1.80)             | .194    |
| Percent Agreement                                                                                     | 71.1%                  | 71.8%                   | .014    |
| I would like to be pursuing a different career that is more challenging for my abilities              |                        |                         |         |
| Mean (SD)                                                                                             | 1.61 (1.04)            | 1.72 (1.22)             | .145    |
| Percent Agreement                                                                                     | 2.3%                   | 2.5%                    | .021    |
| I feel that my studies are an obstacle to the development of my abilities                             |                        |                         |         |
| Mean (SD)                                                                                             | 2.99 (1.69)            | 3.05 (1.74)             | .599    |
| Percent Agreement                                                                                     | 22.0%                  | 21.1%                   | .391    |
| I would like to be pursuing a different career where I can better develop my talents                  |                        |                         |         |
| Mean (SD)                                                                                             | 1.93 (1.34)            | 1.98 (1.45)             | .587    |
| Percent Agreement                                                                                     | 6.9%                   | 6.9%                    | .388    |
| My studies don't offer me opportunities to develop my abilities                                       |                        |                         |         |
| Mean (SD)                                                                                             | 2.58 (1.62)            | 2.61 (1.68)             | .743    |
| Percent Agreement                                                                                     | 16.1%                  | 15.6%                   | .156    |
| When things in school don't turn out as well as they should, I stop trying                            |                        |                         |         |
| Mean (SD)                                                                                             | 2.20 (1.40)            | 2.07 (1.42)             | .184    |
| Percent Agreement                                                                                     | 8.9%                   | 8.9%                    | .027    |
| I give up in response to difficulties in school                                                       |                        |                         |         |
| Mean (SD)                                                                                             | 1.94 (1.19)            | 1.79 (1.21)             | .067    |
| Percent Agreement                                                                                     | 5.6%                   | 4.7%                    | .045    |
| I give up in the face of any difficulties in my academic tasks                                        |                        |                         |         |
| Mean (SD)                                                                                             | 1.86 (1.19)            | 1.70 (1.15)             | .057    |
| Percent Agreement                                                                                     | 4.9%                   | 4.1%                    | .082    |
| When the effort I invest in school is not enough, I give up                                           |                        |                         |         |
| Mean (SD)                                                                                             | 1.99 (1.24)            | 1.86 (1.27)             | .158    |
| Percent Agreement                                                                                     | 6.3%                   | 6.6%                    | .054    |
| <u>Overload Dimension:</u>                                                                            |                        |                         |         |
| Mean Score (SD)                                                                                       | 12.97 (3.97)           | 12.96 (4.12)            | .964    |
| Percent Agreement                                                                                     | 16.4%                  | 15.6%                   | .754    |
| <u>Lack of Development Dimension:</u>                                                                 |                        |                         |         |
| Mean Score (SD)                                                                                       | 11.03 (3.58)           | 11.09 (3.74)            | .812    |
| Percent Agreement                                                                                     | 5.3%                   | 7.0%                    | .299    |
| <u>Neglect Dimension:</u>                                                                             |                        |                         |         |
| Mean Score (SD)                                                                                       | 11.55 (4.32)           | 11.44 (4.42)            | .720    |
| Percent Agreement                                                                                     | 13.2%                  | 11.4%                   | .444    |

# Mental Health Status of Medical Students During the COVID-19 Pandemic

## Final Study Results

### **Suicidal ideation**

|                                                                        | Allopathic Respondents | Osteopathic Respondents | p value |
|------------------------------------------------------------------------|------------------------|-------------------------|---------|
| Since March 2020, seriously considered harming self and/or taking life | 6.6%                   | 7.5%                    | .596    |

### **Substance Use**

|                                                                                                                          | Allopathic Respondents | Osteopathic Respondents | p value |
|--------------------------------------------------------------------------------------------------------------------------|------------------------|-------------------------|---------|
| Started or increased substance use (alcohol, marijuana, or other drugs) to cope with pandemic-related stress or emotions | 20.7%                  | 18.2%                   | .358    |
